# Supplementary material for: Bacterial communities in the gastrointestinal tract segments of helminth-resistant and helminth-susceptible sheep
Source: Anim Microbiome. 2022 Mar 14;4:23. doi: 10.1186/s42523-022-00172-1 (PMC8922854; doi:10.1186/s42523-022-00172-1)
Supplement: Supplementary file 1 — Additional file 1: Table S1. Australian Sheep Breeding Values (ASBVs) for faecal egg count (FEC), worm counts and FEC of each animal used in the study. [file 42523_2022_172_MOESM1_ESM.xlsx]

## Sheet: Sheet1
Sheep ID	Sex	FECgroup	FEC_ASBV	FEC _March	FEC _May	FEC- _JunJul	FEC _August	FEC _September	Total_FEC	Worm burden_September
5061	F	High-FEC	-14.96	120	440	840	160	520	2080	70100
5088	F	High-FEC	18.58	160	0	520	640	360	1680	55700
5413	M	High-FEC	102.58	0	520	760	200	200	1680	50050
5732	F	High-FEC	-9.61	0	40	80	40	240	400	52500
5813	M	High-FEC	68.28	0	120	520	40	80	760	4850
5851	M	High-FEC	84.32	360	440	360	0	320	1480	21920
6008	M	High-FEC	28.15	800	480	160	120	1360	2920	11150
6076	F	High-FEC	7.37	160	440	240	880	1480	3200	19900
6105	F	High-FEC	71.31	0	360	240	920	2455	3975	63020
6153	F	High-FEC	-6.22	80	400	640	120	0	1240	19250
5020	M	Low-FEC	-80.33	0	0	0	0	0	0	250
5146	F	Low-FEC	-69.03	40	280	200	160	160	840	35100
5199	M	Low-FEC	-74.17	0	0	0	0	0	0	600
5474	F	Low-FEC	-44.66	160	0	40	240	40	480	18800
5568	F	Low-FEC	-64.1	0	80	0	160	0	240	4100
5607	M	Low-FEC	-72.62	200	40	0	0	40	280	2800
5936	M	Low-FEC	-64.11	0	0	0	0	0	0	1550
5937	F	Low-FEC	-57.59	80	40	480	0	0	600	22300
5993	F	Low-FEC	-83.93	0	0	0	120	218	338	2450
6081	F	Low-FEC	-48.22	0	720	80	160	360	1320	20800
