# Supplementary material for: Bacterial communities in the gastrointestinal tract segments of helminth-resistant and helminth-susceptible sheep
Source: Anim Microbiome. 2022 Mar 14;4:23. doi: 10.1186/s42523-022-00172-1 (PMC8922854; doi:10.1186/s42523-022-00172-1)
Supplement: Supplementary file 2 — Additional file 2: Table S2. V3-V4 amplicons of the 16S rRNA gene generated from each sample included in the experiment. [file 42523_2022_172_MOESM2_ESM.xlsx]

## Sheet: Mefit_summary_stats
Sample ID	Segment	Group	Total raw reads	Post trimming	Post merging and filtering	Average read length (bp)
5020A	Abomasum	Low-FEC	40014	11774	9325	448
5020Ce	Caecum	Low-FEC	61800	22319	17252	448
5020Cl	Colon	Low-FEC	46847	17941	14503	449
5020D	Duodenum	Low-FEC	91632	32338	26759	446
5020F	Faeces	Low-FEC	50535	14884	11369	448
5020I	Ileum	Low-FEC	90843	35891	27514	443
5020J	Jejunum	Low-FEC	176382	86801	25461	450
5020R	Rumen	Low-FEC	67874	24488	19407	454
5061A	Abomasum	High-FEC	26181	10214	8771	451
5061Ce	Caecum	High-FEC	68054	26234	21464	447
5061Cl	Colon	High-FEC	47990	14272	11775	447
5061D	Duodenum	High-FEC	74292	23365	19572	446
5061F	Faeces	High-FEC	76832	27120	21585	447
5061I	Ileum	High-FEC	73892	28689	21248	460
5061J	Jejunum	High-FEC	212844	80149	59411	448
5061R	Rumen	High-FEC	49430	16334	13147	456
5088A	Abomasum	High-FEC	71911	24813	19600	452
5088Ce	Caecum	High-FEC	55940	21199	16884	450
5088Cl	Colon	High-FEC	54959	19586	15949	447
5088D	Duodenum	High-FEC	35050	14437	13196	445
5088F	Faeces	High-FEC	93229	19741	15468	447
5088I	Ileum	High-FEC	75399	14839	10582	445
5088J	Jejunum	High-FEC	81553	23383	18885	443
5088R	Rumen	High-FEC	52702	18348	14505	453
5146A	Abomasum	Low-FEC	36529	13717	12164	450
5146Ce	Caecum	Low-FEC	51965	19185	15464	448
5146Cl	Colon	Low-FEC	49289	13812	11375	449
5146D	Duodenum	Low-FEC	77209	20159	16361	445
5146F	Faeces	Low-FEC	47889	14325	11151	447
5146I	Ileum	Low-FEC	72368	27210	21777	445
5146J	Jejunum	Low-FEC	145891	67293	33224	444
5146R	Rumen	Low-FEC	41869	12338	10096	454
5199A	Abomasum	Low-FEC	32061	12478	10772	451
5199Ce	Caecum	Low-FEC	78041	23574	18389	447
5199Cl	Colon	Low-FEC	43820	17254	13683	449
5199D	Duodenum	Low-FEC	29828	11240	8920	447
5199F	Faeces	Low-FEC	68313	22660	18040	447
5199I	Ileum	Low-FEC	197850	94497	57511	442
5199J	Jejunum	Low-FEC	220603	137653	4751	445
5199R	Rumen	Low-FEC	28183	10057	7896	455
5413A	Abomasum	High-FEC	29997	11570	8651	451
5413Ce	Caecum	High-FEC	49731	17148	13546	447
5413Cl	Colon	High-FEC	46433	15802	13055	447
5413D	Duodenum	High-FEC	33391	14030	12885	446
5413F	Faeces	High-FEC	61811	22868	18248	446
5413I	Ileum	High-FEC	186204	87244	57712	453
5413J	Jejunum	High-FEC	153864	85590	15447	448
5413R	Rumen	High-FEC	53805	17198	13678	455
5474A	Abomasum	Low-FEC	30220	12077	9866	453
5474Ce	Caecum	Low-FEC	84298	32334	24388	453
5474Cl	Colon	Low-FEC	47498	16479	13556	451
5474D	Duodenum	Low-FEC	124770	54953	37713	447
5474F	Faeces	Low-FEC	53398	15865	11887	450
5474I	Ileum	Low-FEC	186249	92445	36697	455
5474J	Jejunum	Low-FEC	168556	70211	31020	448
5474R	Rumen	Low-FEC	71691	23128	19035	452
5568A	Abomasum	Low-FEC	33362	14449	13378	444
5568Ce	Caecum	Low-FEC	72472	25168	19358	448
5568Cl	Colon	Low-FEC	73658	21674	17932	447
5568D	Duodenum	Low-FEC	68241	17664	14407	448
5568F	Faeces	Low-FEC	45005	14845	11591	448
5568I	Ileum	Low-FEC	159284	69558	52143	445
5568J	Jejunum	Low-FEC	157156	80333	25763	445
5568R	Rumen	Low-FEC	64611	24215	19653	452
5607A	Abomasum	Low-FEC	107689	36713	30088	447
5607Ce	Caecum	Low-FEC	137337	52197	39619	451
5607Cl	Colon	Low-FEC	39753	14581	12055	451
5607D	Duodenum	Low-FEC	136406	41338	31016	447
5607F	Faeces	Low-FEC	46896	16253	12484	451
5607I	Ileum	Low-FEC	126034	34386	30717	452
5607J	Jejunum	Low-FEC	88197	19502	16202	446
5607R	Rumen	Low-FEC	62298	20922	16624	452
5732A	Abomasum	High-FEC	99066	33975	23782	451
5732Ce	Caecum	High-FEC	48799	14241	11535	450
5732Cl	Colon	High-FEC	48691	17012	14119	447
5732D	Duodenum	High-FEC	112612	40511	33439	445
5732F	Faeces	High-FEC	49423	16661	13078	447
5732I	Ileum	High-FEC	185540	89734	62456	453
5732J	Jejunum	High-FEC	132966	52545	33847	444
5732R	Rumen	High-FEC	65312	21072	16269	454
5813A	Abomasum	High-FEC	29216	11767	10327	451
5813Ce	Caecum	High-FEC	44453	15533	12643	449
5813Cl	Colon	High-FEC	46657	16241	13141	448
5813D	Duodenum	High-FEC	49793	14519	12604	446
5813F	Faeces	High-FEC	60313	15321	11923	447
5813I	Ileum	High-FEC	96929	23585	17703	442
5813J	Jejunum	High-FEC	192270	117916	13921	442
5813R	Rumen	High-FEC	80553	26296	21530	454
5851A	Abomasum	High-FEC	64392	21624	17713	450
5851Ce	Caecum	High-FEC	49763	16990	12863	449
5851Cl	Colon	High-FEC	56841	21256	17281	448
5851D	Duodenum	High-FEC	26877	10623	9665	446
5851F	Faeces	High-FEC	77489	10637	8300	447
5851I	Ileum	High-FEC	66220	24434	18849	455
5851J	Jejunum	High-FEC	214593	118353	12928	444
5851R	Rumen	High-FEC	53139	11385	8378	452
5936A	Abomasum	Low-FEC	27019	11063	10058	445
5936Ce	Caecum	Low-FEC	54824	20183	15214	450
5936Cl	Colon	Low-FEC	62040	24091	19765	450
5936D	Duodenum	Low-FEC	27521	9899	8816	446
5936F	Faeces	Low-FEC	62541	22586	17799	450
5936I	Ileum	Low-FEC	236106	111679	39436	444
5936J	Jejunum	Low-FEC	205817	118932	13480	444
5936R	Rumen	Low-FEC	78147	25612	20437	452
5937A	Abomasum	Low-FEC	31229	11838	10090	450
5937Ce	Caecum	Low-FEC	54862	18369	13887	448
5937Cl	Colon	Low-FEC	51567	18379	15374	446
5937D	Duodenum	Low-FEC	101071	28551	21583	448
5937F	Faeces	Low-FEC	87359	11112	8958	446
5937I	Ileum	Low-FEC	67860	26010	17809	440
5937J	Jejunum	Low-FEC	39810	13433	12333	443
5937R	Rumen	Low-FEC	93441	33898	27312	455
5993A	Abomasum	Low-FEC	94273	32658	23074	452
5993Ce	Caecum	Low-FEC	44242	16350	12445	452
5993Cl	Colon	Low-FEC	47238	13795	11616	451
5993D	Duodenum	Low-FEC	87253	25168	18867	447
5993F	Faeces	Low-FEC	72973	24987	19915	445
5993I	Ileum	Low-FEC	92459	34507	19491	457
5993J	Jejunum	Low-FEC	233745	131745	11813	445
5993R	Rumen	Low-FEC	61260	17162	14511	454
6008A	Abomasum	High-FEC	27091	10196	8665	450
6008Ce	Caecum	High-FEC	46400	14926	11671	449
6008Cl	Colon	High-FEC	46866	16826	13260	445
6008D	Duodenum	High-FEC	81003	22741	18556	446
6008F	Faeces	High-FEC	43487	11806	8437	446
6008I	Ileum	High-FEC	93672	36559	24044	444
6008J	Jejunum	High-FEC	245208	140425	5799	444
6008R	Rumen	High-FEC	87213	30113	24304	454
6076A	Abomasum	High-FEC	32449	12872	11348	450
6076Ce	Caecum	High-FEC	50555	18508	13952	447
6076Cl	Colon	High-FEC	43885	15950	13073	447
6076D	Duodenum	High-FEC	29764	12882	11886	445
6076F	Faeces	High-FEC	57958	15933	12377	446
6076I	Ileum	High-FEC	228232	105918	39057	456
6076J	Jejunum	High-FEC	161630	78138	40184	443
6076R	Rumen	High-FEC	74355	15219	11142	453
6081A	Abomasum	Low-FEC	28747	11849	10175	453
6081Ce	Caecum	Low-FEC	41340	13824	10284	448
6081Cl	Colon	Low-FEC	43886	13891	11610	449
6081D	Duodenum	Low-FEC	65999	21240	16806	449
6081F	Faeces	Low-FEC	114787	32711	23350	449
6081I	Ileum	Low-FEC	59231	19410	15900	445
6081J	Jejunum	Low-FEC	230730	122524	43054	448
6081R	Rumen	Low-FEC	48882	13118	10948	455
6105A	Abomasum	High-FEC	30543	11419	9987	449
6105Ce	Caecum	High-FEC	36444	13653	10518	449
6105Cl	Colon	High-FEC	57136	21893	17985	448
6105D	Duodenum	High-FEC	37452	14653	13296	446
6105F	Faeces	High-FEC	57962	19279	14808	446
6105I	Ileum	High-FEC	176451	79578	55648	459
6105J	Jejunum	High-FEC	186586	90277	36074	452
6105R	Rumen	High-FEC	60908	21938	17284	451
6153A	Abomasum	High-FEC	28459	11065	9611	452
6153Ce	Caecum	High-FEC	52372	18554	14855	447
6153Cl	Colon	High-FEC	39154	14165	11610	446
6153D	Duodenum	High-FEC	52713	17428	14457	444
6153F	Faeces	High-FEC	59359	17264	13553	446
6153I	Ileum	High-FEC	263511	135844	46787	459
6153J	Jejunum	High-FEC	164790	85828	46734	460
6153R	Rumen	High-FEC	48198	15532	12337	456
