# Supplementary material for: Bacterial communities in the gastrointestinal tract segments of helminth-resistant and helminth-susceptible sheep
Source: Anim Microbiome. 2022 Mar 14;4:23. doi: 10.1186/s42523-022-00172-1 (PMC8922854; doi:10.1186/s42523-022-00172-1)
Supplement: Supplementary file 3 — Additional file 3: Table S3. Results of Tukey’s test for post-hoc analysis of differences in microbial richness and Shannon index among gastro-intestinal tract (GIT) segments from High- and Low-FEC sheep. [file 42523_2022_172_MOESM3_ESM.xlsx]

## Sheet: H-FEC
Tukey multiple comparisons of means 95% family-wise confidence level	Richness H-FEC							Shannon H-FEC
	diff	lwr	upr	p adj				diff	lwr	upr	p adj
Caecum-Abomasum	-49.68	-82.5413	-16.8187	0.0002917			Caecum-Abomasum	-0.95	-2.14515	0.245154	0.220125
Colon-Abomasum	-38.57	-71.4313	-5.7087	0.0105648			Colon-Abomasum	-0.83	-2.02515	0.365154	0.383101
Duodenum-Abomasum	-38.53	-71.3913	-5.6687	0.010689			Duodenum-Abomasum	-0.9	-2.09515	0.295154	0.28149
Faeces-Abomasum	-32.71	-65.5713	0.151304	0.0519266			Faeces-Abomasum	-0.63	-1.82515	0.565154	0.721237
Ileum-Abomasum	-61.49	-94.3513	-28.6287	3.8e-06			Ileum-Abomasum	-2.79	-3.98515	-1.59485	0.0001
Jejunum-Abomasum	-38.09	-70.9513	-5.2287	0.0121474			Jejunum-Abomasum	-1.1	-2.29515	0.0951541	0.0935116
Rumen-Abomasum	-2.32	-35.1813	30.5413	0.999999			Rumen-Abomasum	0.24	-0.955154	1.43515	0.998381
Colon-Caecum	11.11	-21.7513	43.9713	0.963744			Colon-Caecum	0.12	-1.07515	1.31515	0.999984
Duodenum-Caecum	11.15	-21.7113	44.0113	0.963035			Duodenum-Caecum	0.05	-1.14515	1.24515	0.9999
Faeces-Caecum	16.97	-15.8913	49.8313	0.741515			Faeces-Caecum	0.32	-0.875154	1.51515	0.990387
Ileum-Caecum	-11.81	-44.6713	21.0513	0.949871			Ileum-Caecum	-1.84	-3.03515	-0.644846	0.0002119
Jejunum-Caecum	11.59	-21.2713	44.4513	0.954574			Jejunum-Caecum	-0.15	-1.34515	1.04515	0.999927
Rumen-Caecum	47.36	14.4987	80.2213	0.0006486			Rumen-Caecum	1.19	-0.00515406	2.38515	0.0518026
Duodenum-Colon	0.04	-32.8213	32.9013	1			Duodenum-Colon	-0.07	-1.26515	1.12515	1
Faeces-Colon	5.86	-27.0013	38.7213	0.999248			Faeces-Colon	0.2	-0.995154	1.39515	0.999504
Ileum-Colon	-22.92	-55.7813	9.9413	0.377488			Ileum-Colon	-1.96	-3.15515	-0.764846	6.49e-05
Jejunum-Colon	0.48	-32.3813	33.3413	1			Jejunum-Colon	-0.27	-1.46515	0.925154	0.996592
Rumen-Colon	36.25	3.3887	69.1113	0.0204472			Rumen-Colon	1.07	-0.125154	2.26515	0.112472
Faeces-Duodenum	5.82	-27.0413	38.6813	0.999281			Faeces-Duodenum	0.27	-0.925154	1.46515	0.996592
Ileum-Duodenum	-22.96	-55.8213	9.9013	0.375226			Ileum-Duodenum	-1.89	-3.08515	-0.694846	0.00013
Jejunum-Duodenum	0.44	-32.4213	33.3013	1			Jejunum-Duodenum	-0.2	-1.39515	0.995154	0.999504
Rumen-Duodenum	36.21	3.3487	69.0713	0.0206746			Rumen-Duodenum	1.14	-0.0551541	2.33515	0.0724004
Ileum-Faeces	-28.78	-61.6413	4.0813	0.12922			Ileum-Faeces	-2.16	-3.35515	-0.964846	8.4e-06
Jejunum-Faeces	-5.38	-38.2413	27.4813	0.999571			Jejunum-Faeces	-0.47	-1.66515	0.725154	0.920939
Rumen-Faeces	30.39	-2.4713	63.2513	0.0904664			Rumen-Faeces	0.87	-0.325154	2.06515	0.322935
Jejunum-Ileum	23.4	-9.4613	56.2613	0.350782			Jejunum-Ileum	1.69	0.494846	2.88515	0.0008766
Rumen-Ileum	59.17	26.3087	92.0313	9.1e-06			Rumen-Ileum	3.03	1.83485	4.22515	0.0001
Rumen-Jejunum	35.77	2.9087	68.6313	0.023331			Rumen-Jejunum	1.34	0.144846	2.53515	0.017328
	Richness L-FEC							Shannon L-FEC
Caecum-Abomasum	-44.34	-74.5675	-14.1125	0.0004864			Caecum-Abomasum	-0.99	-2.11084	0.130836	0.122581
Colon-Abomasum	-43.52	-73.7475	-13.2925	0.0006592			Colon-Abomasum	-1	-2.12084	0.120836	0.115007
Duodenum-Abomasum	6.81	-23.4175	37.0375	0.99665			Duodenum-Abomasum	-8.88178e-16	-1.12084	1.12084	0.9999
Faeces-Abomasum	-36.01	-66.2375	-5.78246	0.0089136			Faeces-Abomasum	-0.85	-1.97084	0.270836	0.27314
Ileum-Abomasum	-38.28	-68.5075	-8.05246	0.004214			Ileum-Abomasum	-1.7	-2.82084	-0.579164	0.0002757
Jejunum-Abomasum	-28.85	-59.0775	1.37754	0.0720756			Jejunum-Abomasum	-0.66	-1.78084	0.460836	0.596695
Rumen-Abomasum	-9.39	-39.6175	20.8375	0.97726			Rumen-Abomasum	0.04	-1.08084	1.16084	0.9999
Colon-Caecum	0.82	-29.4075	31.0475	0.9999			Colon-Caecum	-0.01	-1.13084	1.11084	0.9999
Duodenum-Caecum	51.15	20.9225	81.3775	3.46e-05			Duodenum-Caecum	0.99	-0.130836	2.11084	0.122581
Faeces-Caecum	8.33	-21.8975	38.5575	0.988598			Faeces-Caecum	0.14	-0.980836	1.26084	0.99993
Ileum-Caecum	6.06	-24.1675	36.2875	0.998398			Ileum-Caecum	-0.71	-1.83084	0.410836	0.503913
Jejunum-Caecum	15.49	-14.7375	45.7175	0.748878			Jejunum-Caecum	0.33	-0.790836	1.45084	0.983238
Rumen-Caecum	34.95	4.72246	65.1775	0.0124846			Rumen-Caecum	1.03	-0.0908361	2.15084	0.094514
Duodenum-Colon	50.33	20.1025	80.5575	4.8e-05			Duodenum-Colon	1	-0.120836	2.12084	0.115007
Faeces-Colon	7.51	-22.7175	37.7375	0.993874			Faeces-Colon	0.15	-0.970836	1.27084	0.999888
Ileum-Colon	5.24	-24.9875	35.4675	0.999375			Ileum-Colon	-0.7	-1.82084	0.420836	0.522355
Jejunum-Colon	14.67	-15.5575	44.8975	0.796874			Jejunum-Colon	0.34	-0.780836	1.46084	0.980119
Rumen-Colon	34.13	3.90246	64.3575	0.0161048			Rumen-Colon	1.04	-0.0808361	2.16084	0.0883877
Faeces-Duodenum	-42.82	-73.0475	-12.5925	0.0008523			Faeces-Duodenum	-0.85	-1.97084	0.270836	0.27314
Ileum-Duodenum	-45.09	-75.3175	-14.8625	0.0003672			Ileum-Duodenum	-1.7	-2.82084	-0.579164	0.0002757
Jejunum-Duodenum	-35.66	-65.8875	-5.43246	0.0099719			Jejunum-Duodenum	-0.66	-1.78084	0.460836	0.596695
Rumen-Duodenum	-16.2	-46.4275	14.0275	0.704186			Rumen-Duodenum	0.04	-1.08084	1.16084	0.9999
Ileum-Faeces	-2.27	-32.4975	27.9575	0.999998			Ileum-Faeces	-0.85	-1.97084	0.270836	0.27314
Jejunum-Faeces	7.16	-23.0675	37.3875	0.995428			Jejunum-Faeces	0.19	-0.930836	1.31084	0.99946
Rumen-Faeces	26.62	-3.60754	56.8475	0.124875			Rumen-Faeces	0.89	-0.230836	2.01084	0.221241
Jejunum-Ileum	9.43	-20.7975	39.6575	0.976711			Jejunum-Ileum	1.04	-0.0808361	2.16084	0.0883877
Rumen-Ileum	28.89	-1.33754	59.1175	0.0713337			Rumen-Ileum	1.74	0.619164	2.86084	0.0001825
Rumen-Jejunum	19.46	-10.7675	49.6875	0.482734			Rumen-Jejunum	0.7	-0.420836	1.82084	0.522355
