# Supplementary material for: Bacterial communities in the gastrointestinal tract segments of helminth-resistant and helminth-susceptible sheep
Source: Anim Microbiome. 2022 Mar 14;4:23. doi: 10.1186/s42523-022-00172-1 (PMC8922854; doi:10.1186/s42523-022-00172-1)
Supplement: Supplementary file 4 — Additional file 4: Table S4. OTU table and taxonomic information. For each sample, relevant metadata [i.e., gastrointestinal segment and experimental group (High- or Low-FEC)] can be obtained from Table S2. [file 42523_2022_172_MOESM4_ESM.xlsx]

## Sheet: Sheet1
OTU	Taxonomy	5020A	5020Ce	5020Cl	5020D	5020F	5020I	5020J	5020R	5061A	5061Ce	5061Cl	5061D	5061F	5061I	5061J	5061R	5088A	5088Ce	5088Cl	5088D	5088F	5088I	5088J	5088R	5146A	5146Ce	5146Cl	5146D	5146F	5146I	5146J	5146R	5199A	5199Ce	5199Cl	5199D	5199F	5199I	5199J	5199R	5413A	5413Ce	5413Cl	5413D	5413F	5413I	5413J	5413R
DENOVO1	Bacteria;Proteobacteria;Gammaproteobacteria;Enterobacterales;Enterobacteriaceae	0	0	0	0	0	27	0	1	0	85	37	6	61	16120	10380	0	0	1	2	26	3	5	1	0	0	0	0	0	0	2	1	1	0	1	1	0	1	32	0	0	0	23	6	0	3	26235	1453	1
DENOVO2	Bacteria;Firmicutes;Clostridia;Clostridiales;Peptostreptococcaceae;Romboutsia;Romboutsia_timonensis	0	9	2	0	3	6402	2	0	0	14	4	1	31	587	29	0	0	1	13	0	10	418	0	0	0	13	17	0	24	855	10	0	0	15	5	0	54	22268	169	0	0	51	14	0	15	6285	261	0
DENOVO3	Bacteria;Firmicutes;Clostridia;Clostridiales;Peptostreptococcaceae;Paeniclostridium;[Eubacterium]_tenue	0	2	1	0	0	5302	4	0	0	8	2	0	16	314	32	0	0	2	4	0	10	194	0	0	0	10	5	0	4	808	26	0	0	15	2	0	41	15452	156	0	0	35	3	0	1	6355	281	2
DENOVO4	Unclassified	20	4	1	589	0	67	189	4	6	3	3	4350	5	17	1087	2	14	1	2	4807	9	214	1596	3	20	0	3	565	15	254	1984	3	4	4	0	139	20	370	333	0	8	2	1	3427	6	763	1825	14
DENOVO5	Bacteria;Verrucomicrobia;Verrucomicrobiae;Verrucomicrobiales;Akkermansiaceae;Akkermansia;Akkermansia_glycaniphila	0	1407	934	0	596	0	0	0	0	351	195	0	143	0	0	0	0	546	328	0	313	0	2	0	0	964	760	0	249	65	0	0	0	1546	529	0	129	0	0	0	0	2283	1135	0	400	2	0	1
DENOVO6	Bacteria;Firmicutes;Clostridia;Clostridiales;Clostridiaceae;Clostridium	0	0	0	0	0	0	0	0	250	0	0	0	0	660	4934	0	0	0	0	0	0	1	2	1	0	0	0	906	0	16	1	0	14	0	0	0	3	50	6	0	260	1	0	0	0	4919	1851	0
DENOVO7	Bacteria;Firmicutes;Clostridia;Clostridiales	231	118	25	539	40	395	831	83	144	25	25	53	109	112	2996	84	236	2	4	68	21	14	100	94	341	4	0	672	21	254	480	61	312	58	32	202	49	898	280	40	91	19	9	0	16	153	49	19
DENOVO8	Bacteria;Tenericutes;Mollicutes;Mycoplasmatales;Mycoplasmataceae;Ureaplasma;Ureaplasma_felinum	0	0	0	0	0	2	6	0	0	0	0	1	0	9	163	0	1	0	0	38	0	185	0	0	0	0	0	4	0	83	32	0	0	0	0	0	0	0	0	0	0	0	0	0	0	50	153	0
DENOVO9	Unclassified	0	1234	820	0	622	0	0	0	0	554	157	0	234	0	0	0	1	2191	1221	0	862	0	0	0	0	323	252	0	269	69	1	0	0	228	196	0	414	0	0	0	0	321	192	0	208	0	0	0
DENOVO10	Bacteria;Firmicutes;Clostridia;Clostridiales	64	24	3	19	6	275	310	6	7	7	7	98	28	10	1313	20	1	0	4	19	9	500	850	10	15	2	0	55	9	225	3446	12	9	16	2	67	11	494	143	0	6	16	6	57	7	409	117	4
DENOVO11	Bacteria;Firmicutes;Clostridia;Clostridiales	35	3	1	65	2	54	143	2	29	6	5	255	9	27	2540	11	119	2	7	39	5	495	2120	21	59	15	9	115	1	209	1567	8	2	1	1	10	0	144	59	0	92	2	3	44	1	15	1	28
DENOVO12	Bacteria;Firmicutes;Clostridia;Clostridiales	0	1030	491	0	553	1	0	0	0	1693	817	0	2143	0	0	0	0	686	1168	0	1410	0	1	0	0	698	410	0	840	510	1	0	0	903	561	0	1234	0	0	0	0	1014	725	0	1776	0	0	0
DENOVO13	Bacteria;Firmicutes;Clostridia;Clostridiales;Oscillospiraceae;Oscillibacter	18	360	89	0	100	0	0	10	54	210	288	8	345	0	21	166	117	34	40	21	76	1	0	68	69	112	73	101	206	31	0	60	41	358	167	15	170	0	0	13	36	161	111	0	133	0	0	41
DENOVO14	Bacteria;Actinobacteria;Actinobacteria;Bifidobacteriales;Bifidobacteriaceae	23	0	0	10	0	9	5	0	791	2	1	11	1	2	174	0	3	0	0	32	0	39	307	0	67	0	0	747	2	18	21	0	135	2	0	46	1	33	3	0	328	1	0	26	0	65	6	0
DENOVO15	Unclassified	442	19	3	368	13	216	1117	58	41	6	13	100	32	13	1230	27	117	1	1	461	14	172	390	42	108	4	8	344	20	196	2218	53	64	7	5	55	20	420	126	26	32	4	7	125	5	249	247	27
DENOVO16	Unclassified	28	40	2	97	10	23	84	2	0	2	3	722	9	4	81	2	1	0	1	202	6	14	807	2	1	4	3	45	9	12	505	1	3	16	4	73	37	65	15	1	0	9	2	137	2	55	20	1
DENOVO17	Bacteria	175	2	6	628	4	84	191	18	7	1	2	197	0	11	366	2	16	0	0	9	0	118	221	6	12	2	0	104	4	166	1104	5	8	5	2	143	1	274	140	7	0	2	3	78	0	2	13	1
DENOVO18	Bacteria;Firmicutes;Clostridia;Clostridiales;Lachnospiraceae;Butyrivibrio;Butyrivibrio_fibrisolvens	5	2	0	249	0	2	84	18	12	0	0	1	0	0	5	3	19	0	0	12	0	0	0	22	11	0	0	72	7	8	7	12	9	1	2	2	0	5	0	7	0	0	0	0	2	3	0	8
DENOVO19	Unclassified	19	2	1	52	0	68	34	1	1	3	0	18	0	3	342	0	0	0	0	24	0	39	136	0	3	2	0	17	0	150	2264	0	0	0	0	11	0	180	77	0	0	0	1	37	0	29	0	0
DENOVO20	Bacteria;Firmicutes;Clostridia;Clostridiales;Clostridiales_Family_XIII._Incertae_Sedis	67	4	0	5	2	79	66	15	19	1	2	12	12	4	367	14	21	0	0	31	0	51	135	9	11	0	1	146	10	40	67	6	4	2	3	112	6	205	25	11	10	3	7	0	3	69	25	29
DENOVO21	Bacteria;Proteobacteria;Epsilonproteobacteria;Campylobacterales;Campylobacteraceae;Campylobacter;Campylobacter_jejuni	0	0	0	0	0	0	0	0	0	0	0	0	0	0	0	0	0	0	0	0	6	4	0	0	0	0	0	32	0	1	29	0	0	0	0	0	0	0	0	0	0	0	0	0	0	0	0	0
DENOVO22	Bacteria;Tenericutes;Mollicutes;Mycoplasmatales;Mycoplasmataceae;Mycoplasma	0	0	0	0	0	0	0	0	0	0	0	0	0	10	160	0	0	0	0	1	0	13	0	1	0	0	0	0	0	0	0	0	0	0	0	0	0	6	3	0	0	0	0	0	0	25	32	0
DENOVO23	Bacteria;Proteobacteria;Epsilonproteobacteria;Campylobacterales;Helicobacteraceae;Helicobacter;Helicobacter_pylori	0	0	0	0	0	0	0	0	0	0	0	21	0	1	17	2	0	0	0	0	0	0	0	0	0	0	0	0	0	0	10	0	0	0	0	0	2	0	0	0	0	6	0	0	0	0	0	0
DENOVO24	Bacteria;Firmicutes;Clostridia;Clostridiales	0	108	80	0	67	0	0	0	0	217	118	0	552	0	0	0	0	96	243	5	209	1	1	0	0	66	59	0	116	55	0	0	0	178	134	0	244	0	0	0	0	668	416	0	1609	0	0	0
DENOVO25	Bacteria;Bacteroidetes;Bacteroidia;Bacteroidales;Bacteroidaceae;Bacteroides	0	399	411	0	296	0	0	0	0	564	256	0	377	0	1	0	0	225	136	0	214	0	0	1	0	212	281	0	199	58	0	0	0	233	125	0	95	0	0	0	0	251	191	0	220	0	0	0
DENOVO26	Bacteria;Firmicutes;Clostridia;Clostridiales	146	0	2	1860	0	4	389	99	44	1	3	14	1	0	22	13	52	0	1	118	0	0	0	30	37	1	0	355	0	3	27	18	102	5	2	23	0	29	4	26	9	7	1	67	5	23	30	43
DENOVO27	Bacteria;Firmicutes;Clostridia;Clostridiales;Lachnospiraceae	175	7	8	796	5	7	404	125	27	1	0	53	3	1	48	10	337	0	0	16	6	5	20	129	46	1	0	151	4	7	32	16	39	7	2	5	1	32	5	21	13	4	1	0	3	40	106	41
DENOVO28	Bacteria;Firmicutes;Clostridia;Clostridiales;Hungateiclostridiaceae;Saccharofermentans;Saccharofermentans_acetigenes	153	11	6	31	4	122	438	51	15	0	1	0	14	11	139	4	67	2	1	0	14	11	84	38	49	7	2	108	4	51	152	13	36	16	14	70	7	372	170	26	30	0	2	0	9	9	18	48
DENOVO29	Bacteria;Firmicutes;Clostridia;Clostridiales;Ruminococcaceae;Ruminococcus;Ruminococcus_flavefaciens	131	10	2	33	7	6	85	217	16	2	8	152	6	0	8	19	12	1	0	664	7	9	93	34	17	3	1	100	0	5	245	41	107	4	1	259	15	146	31	61	31	7	1	104	3	55	7	47
DENOVO30	Bacteria;Firmicutes;Clostridia;Clostridiales;Lachnospiraceae;Butyrivibrio;Butyrivibrio_proteoclasticus	26	0	3	3850	9	1	237	141	9	2	0	0	2	0	3	12	6	2	0	21	0	0	1	35	16	2	0	44	8	10	2	43	33	7	3	4	1	8	11	35	23	0	0	0	2	88	36	108
DENOVO31	Bacteria;Firmicutes;Clostridia;Clostridiales	25	0	0	117	1	45	74	3	5	2	2	31	0	4	371	4	679	1	1	4	0	21	149	170	50	3	2	75	12	40	422	7	6	1	2	19	0	79	19	2	17	0	0	0	0	10	47	7
DENOVO32	Bacteria;Firmicutes;Clostridia;Clostridiales;Clostridiaceae;Clostridium	0	0	0	0	1	608	0	0	0	1	0	0	0	113	10	0	0	1	0	0	0	10	0	0	0	0	1	0	0	84	0	0	0	1	0	0	1	96	4	0	0	0	0	0	0	27	0	0
DENOVO33	Unclassified	11	4	0	19	1	145	95	0	0	1	2	113	4	1	378	1	1	0	0	39	0	27	97	2	2	0	1	13	0	26	775	4	0	4	0	6	1	98	18	0	1	0	0	402	2	45	110	1
DENOVO34	Unclassified	28	6	3	35	3	105	520	3	3	1	5	12	4	2	333	0	0	0	0	23	0	5	9	1	3	1	1	15	0	13	46	0	10	3	4	53	11	124	105	0	7	5	3	40	2	119	67	2
DENOVO35	Bacteria;Firmicutes;Clostridia;Clostridiales	44	38	8	19	4	0	8	21	57	7	8	1	27	0	4	137	45	6	8	58	10	0	0	39	65	5	5	26	28	12	0	81	8	15	3	15	14	3	2	11	191	10	3	0	4	13	40	124
DENOVO36	Unclassified	0	0	0	1	0	0	4	1	15	0	0	8	0	0	0	25	63	0	0	0	0	0	0	19	1	0	0	0	0	0	3	0	3	0	0	1	0	0	0	3	65	0	0	0	0	0	0	97
DENOVO37	Bacteria;Firmicutes;Erysipelotrichia;Erysipelotrichales;Erysipelotrichaceae;Turicibacter;Turicibacter_sanguinis	0	2	1	0	0	788	0	0	0	2	1	24	0	9	30	0	0	1	3	0	0	3	0	0	0	0	0	0	0	13	0	0	0	5	0	0	5	922	17	0	0	5	0	0	1	4	0	0
DENOVO38	Unclassified	0	52	23	0	38	0	0	0	0	0	0	0	0	0	0	0	17	0	0	0	0	0	1	23	2	0	0	0	0	0	0	6	0	184	203	1	1	0	0	0	0	0	0	0	0	0	0	0
DENOVO39	Bacteria;Firmicutes;Erysipelotrichia;Erysipelotrichales;Erysipelotrichaceae;Solobacterium;Solobacterium_moorei	7	0	0	21	0	78	156	2	0	0	0	33	0	2	60	0	1	0	0	0	0	21	61	0	0	0	0	5	0	23	161	0	1	1	0	8	0	267	103	0	0	0	0	248	0	2	0	0
DENOVO40	Bacteria;Firmicutes;Clostridia;Clostridiales	32	3	2	14	3	71	140	1	24	4	1	0	0	7	2559	7	11	1	0	0	0	0	17	5	27	5	3	120	8	32	242	4	8	3	0	64	2	187	103	0	17	0	2	0	1	4	0	2
DENOVO41	Unclassified	0	0	0	35	0	0	0	0	1	0	1	139	6	0	126	1	2	0	0	108	2	7	33	0	0	0	0	23	0	10	111	0	0	0	0	1	3	0	2	0	0	1	1	14	1	17	51	0
DENOVO42	Unclassified	2	3	3	8	1	104	36	3	0	5	4	32	26	13	338	2	8	0	1	4	27	166	254	1	4	2	2	7	6	47	206	1	0	2	0	2	5	31	3	0	2	5	2	2	6	95	3	2
DENOVO43	Bacteria;Firmicutes;Clostridia;Clostridiales;Lachnospiraceae	0	0	0	8	0	8	15	0	0	0	0	2	7	6	721	2	0	0	0	15	0	67	81	0	1	0	0	12	7	206	429	5	0	1	1	1	14	136	2	0	0	0	2	0	2	80	95	2
DENOVO44	Unclassified	69	6	0	2	0	0	1	235	112	0	3	20	15	0	5	371	96	0	0	0	0	0	1	52	28	0	0	1	0	0	10	30	152	0	0	154	2	0	0	156	78	0	0	0	0	0	0	205
DENOVO45	Bacteria;Firmicutes;Clostridia;Clostridiales	33	5	4	1	1	14	50	6	24	3	1	0	0	3	391	18	20	0	0	0	0	0	0	5	49	2	1	78	14	3	0	19	6	4	2	48	0	11	2	4	25	3	2	0	8	3	1	9
DENOVO46	Unclassified	0	3	0	0	1	0	8	4	11	2	1	13	1	0	4	17	251	0	1	0	0	0	0	225	84	8	3	7	13	7	0	239	4	2	0	23	1	0	0	7	1	0	0	0	0	0	0	1
DENOVO47	Bacteria;Firmicutes;Clostridia;Clostridiales;Unclassified;Flintibacter;Flintibacter_butyricus	1	0	1	1417	0	1	1	0	6	1	0	0	0	4	183	4	58	0	2	0	0	2	23	31	26	0	1	85	0	60	37	9	0	0	0	1	2	0	0	0	9	0	1	0	3	11	3	3
DENOVO48	Bacteria;Firmicutes;Negativicutes;Acidaminococcales;Acidaminococcaceae;Succiniclasticum;Succiniclasticum_ruminis	8	14	11	1	2	3	640	58	12	5	1	9	3	0	6	52	7	0	0	8	1	0	0	47	23	0	0	27	4	11	0	57	22	14	6	147	3	43	0	20	20	6	2	0	4	376	484	63
DENOVO49	Unclassified	1	6	1	0	4	46	104	3	3	0	5	97	15	7	682	2	5	0	0	0	0	7	10	3	13	0	0	7	0	6	143	2	0	1	3	5	2	29	9	0	1	1	2	6	0	3	0	1
DENOVO50	Unclassified	0	46	45	0	23	0	0	0	0	141	135	11	229	0	0	0	0	275	233	0	357	0	0	0	0	210	309	0	278	47	0	0	0	70	86	0	47	0	0	0	0	66	46	0	131	0	0	0
DENOVO51	Bacteria;Firmicutes;Clostridia;Clostridiales;Ruminococcaceae	11	26	13	14	12	0	48	20	47	63	48	0	91	0	0	10	14	86	50	0	96	0	0	2	28	51	31	26	50	101	0	5	214	43	14	3	52	0	0	10	21	114	105	0	129	0	0	17
DENOVO52	Unclassified	18	16	5	9	5	158	41	4	0	5	4	95	25	11	395	1	3	2	3	5	12	120	216	5	11	0	3	18	10	33	280	0	3	1	0	15	14	88	16	0	4	7	3	17	1	54	23	3
DENOVO53	Bacteria;Firmicutes;Clostridia;Clostridiales;Lachnospiraceae	0	0	0	5	0	7	10	0	0	0	0	18	1	2	112	1	1	0	1	0	7	45	86	0	0	0	1	0	0	65	1345	0	0	0	0	0	1	12	0	0	0	0	0	5	0	32	2	0
DENOVO54	Bacteria;Firmicutes;Clostridia;Clostridiales;Clostridiales_Family_XIII._Incertae_Sedis;Mogibacterium	17	1	0	19	0	81	34	1	1	1	5	835	4	6	304	4	3	0	2	63	11	92	228	4	4	0	1	68	1	54	156	0	2	1	0	86	2	71	16	1	4	0	0	173	2	13	41	2
DENOVO55	Bacteria;Firmicutes;Clostridia;Clostridiales;Lachnospiraceae	20	1	2	9	3	101	22	3	0	2	1	14	1	2	289	2	1	0	0	0	0	70	163	1	1	0	0	2	0	54	185	1	0	0	0	3	7	199	26	2	1	0	0	22	0	10	0	1
DENOVO56	Bacteria;Firmicutes;Clostridia;Clostridiales;Lachnospiraceae	13	5	2	165	3	160	71	4	1	0	1	35	6	7	374	1	3	0	0	7	0	6	14	1	6	3	2	37	1	117	396	7	6	2	1	18	2	112	37	3	0	3	0	19	0	6	0	0
DENOVO57	Bacteria;Firmicutes;Clostridia;Clostridiales	186	51	14	283	23	211	505	68	132	9	10	39	29	39	631	116	214	7	5	97	25	16	43	75	255	4	3	577	29	218	175	48	246	37	17	126	27	244	28	30	111	17	4	0	11	146	70	34
DENOVO58	Bacteria;Firmicutes;Clostridia;Clostridiales;Lachnospiraceae	12	3	1	4	2	105	169	3	0	0	1	5	0	4	695	0	1	0	1	137	0	89	253	2	1	0	0	0	0	44	280	1	0	2	0	8	3	225	29	0	1	3	2	0	1	100	133	5
DENOVO59	Bacteria;Firmicutes;Clostridia;Clostridiales;Clostridiales_Family_XIII._Incertae_Sedis	12	2	1	79	0	16	15	1	3	0	1	572	2	1	209	1	2	0	0	105	0	83	277	1	6	0	0	84	0	31	114	3	1	0	0	90	4	45	10	0	4	0	1	107	5	63	85	2
DENOVO60	Bacteria;Tenericutes;Mollicutes;Mycoplasmatales;Mycoplasmataceae;Mycoplasma	0	0	0	0	0	0	0	0	0	0	0	0	0	0	0	0	0	1	1	0	0	59	0	0	0	0	1	0	0	50	12	0	0	0	0	0	0	0	0	0	0	0	0	0	0	4	0	0
DENOVO61	Bacteria;Actinobacteria;Actinobacteria;Bifidobacteriales;Bifidobacteriaceae	1	0	0	0	0	0	0	0	0	0	0	0	0	0	0	0	0	0	0	0	0	0	0	0	0	0	0	0	0	0	0	0	0	0	0	0	0	0	0	0	0	0	0	0	0	0	0	0
DENOVO62	Unclassified	13	5	2	50	0	5	20	2	2	1	0	96	7	0	21	5	10	0	0	34	0	2	15	5	16	0	0	99	0	6	30	3	8	0	0	32	1	29	7	1	3	0	0	275	4	33	55	4
DENOVO63	Bacteria;Firmicutes;Clostridia;Clostridiales;Lachnospiraceae;Pseudobutyrivibrio;Pseudobutyrivibrio_ruminis	81	0	1	40	2	10	342	145	11	3	1	0	22	0	6	26	9	5	7	0	13	0	2	63	17	4	1	16	5	1	0	60	23	1	4	9	9	6	3	23	17	0	1	0	2	46	0	41
DENOVO64	Unclassified	1	0	0	0	0	0	0	1	1	0	0	0	0	0	0	0	0	0	0	0	0	0	0	0	0	0	0	0	0	0	0	0	9	0	0	2	0	35	21	6	0	0	0	0	0	0	0	0
DENOVO65	Bacteria;Firmicutes;Clostridia;Clostridiales;Unclassified;Flintibacter;Flintibacter_butyricus	19	6	1	19	0	7	32	1	9	0	1	9	0	0	59	0	3	0	0	14	0	3	3	5	17	2	0	57	1	20	204	5	5	4	0	82	0	20	12	1	6	0	3	0	2	22	0	3
DENOVO66	Bacteria;Firmicutes;Bacilli;Bacillales;Bacillaceae	0	0	0	0	0	96	8	0	0	1	1	0	4	3	181	0	0	0	1	0	8	47	3	0	0	0	0	0	0	24	2	0	0	2	0	0	4	412	7	0	0	0	0	0	0	12	0	0
DENOVO67	Bacteria;Bacteroidetes;Bacteroidia;Bacteroidales;Rikenellaceae;Alistipes	0	100	72	0	26	0	0	0	0	126	116	0	183	0	0	0	0	346	137	0	351	0	0	0	0	208	148	0	173	96	0	0	0	102	112	0	72	0	0	0	0	52	42	0	35	0	0	0
DENOVO68	Unclassified	16	1	1	106	0	104	46	0	5	0	0	9	5	1	196	2	1	0	0	6	2	0	0	0	6	1	1	17	3	95	18	1	10	1	1	13	0	112	4	1	4	3	1	0	0	31	0	0
DENOVO69	Bacteria;Firmicutes;Clostridia;Clostridiales;Lachnospiraceae	12	0	2	5	3	28	25	6	3	2	0	0	7	0	121	1	1	0	0	0	0	46	63	2	17	0	2	29	3	15	28	1	12	6	1	152	2	84	3	1	10	0	2	0	0	7	0	3
DENOVO70	Bacteria	1	0	0	21	0	6	26	1	1	0	0	147	0	3	100	1	1	0	0	202	0	26	96	0	0	0	0	6	0	9	46	0	0	0	0	3	1	37	16	0	0	0	0	248	0	13	31	0
DENOVO71	Bacteria;Firmicutes;Clostridia;Clostridiales;Eubacteriaceae;Eubacterium;Eubacterium_ventriosum	0	0	0	8	0	0	0	0	1	1	1	306	0	0	13	0	2	1	2	29	11	32	235	4	3	1	1	18	5	32	62	1	0	0	0	0	4	0	0	0	1	4	0	0	0	42	146	2
DENOVO72	Unclassified	0	0	0	0	0	0	54	6	5	0	0	0	0	0	1	18	5	0	0	0	1	0	0	7	1	0	0	0	0	0	0	0	2	0	0	1	0	0	0	0	35	0	0	0	0	9	0	30
DENOVO73	Bacteria;Firmicutes;Negativicutes;Acidaminococcales;Acidaminococcaceae;Succiniclasticum;Succiniclasticum_ruminis	29	10	6	0	8	7	459	34	6	1	0	6	2	0	2	5	3	1	0	13	1	0	0	13	3	0	1	31	0	7	0	18	14	6	4	61	0	22	0	5	10	12	3	0	2	176	183	13
DENOVO74	Bacteria;Firmicutes;Clostridia;Clostridiales;Christensenellaceae;Christensenella	0	0	0	2	0	0	0	1	5	0	0	0	0	0	0	18	27	0	0	8	0	0	0	27	5	0	0	1	0	0	0	9	0	1	0	2	0	0	0	2	5	0	0	0	0	5	0	18
DENOVO75	Unclassified	143	18	9	0	9	0	0	103	32	0	0	2	0	0	14	36	33	0	1	40	0	2	4	24	175	0	0	4	0	0	0	84	57	0	0	51	0	8	3	22	4	0	0	1	0	1	0	20
DENOVO76	Unclassified	0	501	100	0	185	0	0	0	0	71	130	0	172	0	0	0	0	23	39	0	90	0	0	0	0	9	2	0	19	5	0	0	0	81	81	0	463	0	0	0	0	31	9	0	17	0	0	0
DENOVO77	Bacteria	20	1	0	159	0	52	45	2	0	0	0	174	5	2	79	2	3	0	0	15	0	24	26	3	3	0	0	30	0	90	287	1	1	1	0	12	1	59	3	0	0	1	0	0	0	5	0	0
DENOVO78	Unclassified	0	0	0	0	0	0	0	0	0	0	0	0	0	0	0	0	0	0	0	24	0	0	0	0	0	0	0	0	0	0	0	0	0	0	0	0	3	0	0	0	3	0	0	1153	1	9	0	12
DENOVO79	Unclassified	0	11	1	0	3	0	0	0	0	1	0	0	0	0	0	0	1	0	0	0	0	0	0	6	5	0	0	0	0	0	0	3	0	95	59	0	0	3	0	0	1	4	0	0	0	0	0	0
DENOVO80	Bacteria;Firmicutes;Clostridia;Clostridiales;Oscillospiraceae;Oscillibacter	0	130	57	0	56	0	0	0	0	94	72	0	107	0	0	0	0	50	46	0	49	0	0	0	0	36	23	0	19	28	0	0	0	88	39	0	60	0	0	0	0	173	106	0	114	0	0	0
DENOVO81	Bacteria;Firmicutes;Clostridia;Clostridiales;Ruminococcaceae	0	48	49	0	31	0	0	0	1	49	35	0	91	0	0	0	0	110	54	0	72	0	0	0	1	8	8	0	10	21	0	2	0	70	20	0	58	0	0	0	1	228	315	0	327	0	0	0
DENOVO82	Unclassified	32	2	2	0	3	2	77	144	32	2	2	6	15	0	3	86	14	0	1	0	2	1	0	39	42	0	0	21	0	2	2	95	52	7	4	16	12	2	11	68	33	0	0	0	0	7	0	146
DENOVO83	Bacteria	1	67	41	1	55	0	0	0	1	247	177	0	312	0	1	0	1	97	111	0	211	0	0	0	1	110	124	1	194	186	0	2	1	115	37	0	298	0	0	0	0	113	48	0	121	0	0	0
DENOVO84	Bacteria;Firmicutes;Clostridia;Clostridiales	21	1	1	0	0	0	0	32	33	0	0	9	0	0	0	49	15	0	0	30	0	0	0	13	46	0	0	10	0	0	0	60	22	0	0	8	1	0	0	11	51	0	1	0	0	0	0	28
DENOVO85	Unclassified	15	0	0	2	0	0	0	57	4	0	0	0	0	0	0	23	30	0	0	837	0	0	0	30	10	0	0	1	0	0	0	13	8	1	0	0	0	0	0	8	24	0	0	0	0	275	208	54
DENOVO86	Bacteria;Firmicutes;Clostridia;Clostridiales;Ruminococcaceae	37	24	11	8	7	0	3	90	21	0	0	9	0	0	0	22	37	0	0	14	0	0	0	18	56	0	0	9	0	0	0	57	54	14	9	10	0	0	0	23	32	3	2	0	1	0	0	27
DENOVO87	Unclassified	8	3	1	0	4	45	133	17	8	1	4	382	7	0	26	18	32	2	0	0	2	223	12	32	29	2	1	18	2	4	2	16	24	3	1	7	1	29	5	10	6	6	8	0	5	5	0	12
DENOVO88	Unclassified	0	0	0	0	0	0	0	0	0	0	0	0	0	0	0	0	0	0	0	0	0	0	0	0	0	0	0	0	0	0	0	0	0	0	0	0	0	0	0	0	0	0	0	0	0	0	0	0
DENOVO89	Bacteria;Firmicutes;Clostridia;Clostridiales;Clostridiales_Family_XIII._Incertae_Sedis	3	0	0	2	0	0	2	0	2	0	0	0	0	2	42	1	10	0	0	8	0	0	0	14	2	1	0	29	0	0	0	2	1	1	0	3	0	0	3	0	9	2	0	0	1	3	0	17
DENOVO90	Bacteria;Firmicutes;Clostridia;Clostridiales;Ruminococcaceae;Unclassified;[Clostridium]_viride	0	120	48	0	56	0	0	0	0	99	97	0	234	0	0	0	0	68	78	0	166	0	0	0	0	51	41	0	92	26	0	0	0	123	66	0	81	0	0	0	0	66	30	0	47	0	0	0
DENOVO91	Bacteria;Bacteroidetes;Bacteroidia;Bacteroidales;Prevotellaceae;Alloprevotella;Alloprevotella_rava	0	0	0	0	0	0	0	0	0	1	0	0	0	0	0	0	0	9	2	0	5	0	0	0	0	8	5	0	0	3	0	0	0	6	7	0	0	0	0	0	0	84	48	0	23	0	0	0
DENOVO92	Bacteria;Firmicutes;Clostridia;Clostridiales;Clostridiales_Family_XIII._Incertae_Sedis	1	0	0	0	0	0	0	0	1	0	1	0	0	0	15	7	6	0	0	17	0	0	1	5	2	0	0	12	0	0	0	3	0	0	0	3	0	0	5	0	13	0	0	0	1	0	80	20
DENOVO93	Bacteria;Firmicutes;Clostridia;Clostridiales;Clostridiaceae;Clostridium	0	0	0	0	0	76	0	0	0	1	0	0	0	3	0	0	0	0	0	0	0	0	0	0	0	0	1	0	0	26	0	0	0	0	0	0	0	28	0	0	0	0	0	0	0	0	0	0
DENOVO94	Unclassified	1	0	2	22	0	0	2	0	0	1	0	140	0	0	7	0	1	0	0	4	0	10	44	0	5	1	0	13	18	47	346	0	2	2	0	35	0	146	68	0	0	0	0	66	0	1	0	0
DENOVO95	Unclassified	2	1	0	31	1	44	57	0	1	2	0	0	0	3	60	0	2	1	0	0	0	2	59	1	0	0	0	22	0	10	46	0	1	3	0	52	1	103	29	0	2	0	0	0	0	0	0	2
DENOVO96	Bacteria;Bacteroidetes;Bacteroidia;Bacteroidales;Prevotellaceae;Paraprevotella;Paraprevotella_clara	0	42	18	0	24	0	0	0	0	64	20	0	30	0	0	0	0	64	36	0	24	0	0	0	0	40	25	0	20	24	0	0	0	56	17	0	22	0	0	0	0	11	8	0	6	0	0	0
DENOVO97	Unclassified	0	0	0	6	0	1	1	1	3	3	0	34	9	9	413	1	5	0	0	21	0	39	55	3	10	1	0	56	3	69	737	7	0	0	0	0	3	0	0	0	0	1	0	56	1	65	38	0
DENOVO98	Bacteria;Firmicutes;Clostridia;Clostridiales;Lachnospiraceae;Stomatobaculum;Stomatobaculum_longum	10	0	0	0	0	0	0	1	3	0	0	0	0	0	0	3	11	0	0	0	0	0	0	10	8	0	0	10	0	0	0	11	4	0	0	1	0	0	0	2	10	0	0	0	0	0	0	45
DENOVO99	Unclassified	4	3	0	56	0	5	15	0	0	0	0	307	0	1	74	0	0	0	0	22	2	17	89	0	1	0	0	26	1	18	105	2	0	1	0	6	0	113	76	0	0	0	0	151	0	11	90	0
DENOVO100	Unclassified	0	0	0	0	0	0	0	0	22	0	0	4	0	0	0	44	63	0	0	0	0	0	0	18	176	0	0	6	0	0	0	101	0	0	0	1	0	0	0	0	22	0	0	0	0	0	0	61
DENOVO101	Bacteria;Firmicutes;Clostridia;Clostridiales;Lachnospiraceae	19	0	1	36	1	6	45	1	0	1	0	0	0	0	85	1	1	0	0	41	0	28	97	1	0	0	2	18	0	15	117	2	0	0	0	11	3	15	2	2	0	0	0	0	3	14	91	3
DENOVO102	Bacteria;Proteobacteria;Deltaproteobacteria;Desulfovibrionales;Desulfovibrionaceae;Desulfovibrio	1	0	0	0	0	7	43	1	3	0	0	0	0	4	260	3	3	0	0	0	0	0	0	1	1	0	0	4	0	3	1	0	0	0	0	3	0	5	0	0	0	0	0	0	0	147	112	0
DENOVO103	Bacteria;Firmicutes;Clostridia;Clostridiales;Eubacteriaceae;Eubacterium;Eubacterium_oxidoreducens	3	0	1	22	0	6	21	3	1	1	0	20	0	2	57	0	1	0	0	56	0	4	4	1	0	0	0	12	0	7	86	2	5	2	0	16	0	136	64	3	0	0	0	61	1	3	0	1
DENOVO104	Unclassified	8	12	3	8	3	172	90	2	2	4	4	34	28	22	690	6	3	0	4	44	3	136	217	1	10	0	4	12	19	50	366	2	0	1	1	7	19	144	15	4	0	7	8	30	2	102	53	2
DENOVO105	Unclassified	4	0	1	0	0	0	1	9	1	0	0	0	0	0	0	6	4	0	0	0	0	0	0	1	0	0	0	3	0	0	0	0	0	0	0	2	0	0	0	1	52	0	0	0	0	2	0	272
DENOVO106	Bacteria;Firmicutes;Clostridia;Clostridiales;Lachnospiraceae	6	6	1	5	1	5	7	0	0	0	1	26	0	5	33	1	2	0	0	0	0	20	46	1	0	0	2	8	2	17	97	0	0	0	0	1	0	12	0	2	0	0	0	0	0	7	0	0
DENOVO107	Bacteria;Firmicutes;Clostridia;Clostridiales;Ruminococcaceae;Flavonifractor;Flavonifractor_plautii	0	90	16	0	37	0	0	0	0	89	81	0	88	0	0	0	0	24	29	0	49	0	0	0	0	42	30	0	63	66	0	0	0	75	42	0	113	0	0	0	0	80	26	0	65	0	0	0
DENOVO108	Bacteria;Proteobacteria;Epsilonproteobacteria;Campylobacterales;Campylobacteraceae;Campylobacter	0	0	1	0	0	0	0	0	0	0	21	0	50	0	2	0	0	9	5	0	68	0	0	0	0	0	9	0	16	5	0	0	0	6	3	0	5	0	0	0	0	0	0	0	0	0	0	0
DENOVO109	Unclassified	0	0	0	12	0	4	4	0	2	0	1	91	0	2	35	1	2	0	0	45	0	4	25	0	4	0	0	36	0	10	82	1	0	0	0	8	0	5	6	0	1	0	0	80	0	38	57	3
DENOVO110	Bacteria;Firmicutes;Clostridia;Clostridiales;Clostridiales_Family_XIII._Incertae_Sedis;Aminipila;Aminipila_butyrica	37	3	0	6	0	2	37	5	17	0	0	0	0	0	28	2	21	0	0	0	0	1	1	5	18	0	0	57	3	1	6	0	25	0	0	249	0	6	0	3	9	0	0	0	0	10	35	2
DENOVO111	Bacteria;Firmicutes;Clostridia;Clostridiales;Oscillospiraceae;Oscillibacter;Oscillibacter_valericigenes	0	6	0	0	1	0	0	0	0	60	50	0	62	0	0	0	0	64	30	0	63	0	0	0	0	45	40	0	60	22	0	0	0	16	11	0	35	0	0	0	0	41	15	0	24	0	0	0
DENOVO112	Unclassified	0	0	0	0	0	0	0	1	1	0	0	0	0	0	0	11	4	0	0	13	0	0	1	7	4	0	0	0	0	0	0	2	5	0	0	0	0	0	0	2	66	0	0	0	0	0	0	51
DENOVO113	Unclassified	12	0	1	1	0	0	6	0	3	0	0	780	0	0	3	0	10	0	0	0	0	5	0	2	2	0	0	8	0	0	10	0	1	0	0	1	0	2	0	0	0	0	0	0	1	0	0	1
DENOVO114	Bacteria;Bacteroidetes;Bacteroidia;Bacteroidales;Bacteroidaceae;Bacteroides	0	31	23	0	14	0	0	0	0	118	48	0	88	0	0	0	0	40	24	0	53	0	0	0	0	44	68	0	53	16	1	0	0	105	71	0	48	0	0	0	0	215	101	0	117	0	0	0
DENOVO115	Unclassified	0	5	4	0	1	0	0	0	0	10	11	0	59	0	0	0	0	1	1	0	0	0	0	0	0	22	27	0	9	39	0	0	0	15	27	0	0	0	0	0	0	0	0	0	0	0	0	0
DENOVO116	Bacteria;Bacteroidetes;Flavobacteriia;Flavobacteriales;Flavobacteriaceae;Flavobacterium	0	0	0	0	0	0	7	0	0	0	0	0	0	0	6	0	0	0	0	0	0	0	0	0	0	0	0	0	0	0	21	0	0	0	0	0	0	14	2	0	0	0	0	0	0	16	152	0
DENOVO117	Unclassified	6	0	0	0	0	0	0	10	24	0	0	0	0	0	0	49	133	0	0	0	0	0	0	48	73	0	0	1	0	1	1	51	7	0	0	1	0	0	0	17	22	0	0	0	0	0	0	42
DENOVO118	Unclassified	0	86	11	0	14	0	0	0	0	66	25	0	103	0	0	0	0	13	23	0	33	0	0	0	0	43	24	0	68	30	0	0	0	43	31	0	43	0	0	0	0	43	37	0	30	0	0	0
DENOVO119	Bacteria;Actinobacteria;Coriobacteriia;Eggerthellales;Eggerthellaceae;Raoultibacter;Raoultibacter_massiliensis	1	0	0	5	0	10	28	0	0	0	0	0	0	2	133	0	1	0	0	1	0	20	74	0	3	0	1	7	0	10	113	0	0	0	0	0	3	27	7	1	0	0	1	0	1	20	6	0
DENOVO120	Unclassified	0	115	9	0	20	0	0	1	2	0	0	20	0	0	0	13	14	0	0	0	0	1	0	19	3	0	0	1	0	0	0	5	210	1	0	60	48	1	1	272	28	0	0	0	0	0	0	113
DENOVO121	Unclassified	0	0	1	15	0	0	0	0	0	0	0	448	0	1	45	0	4	0	0	0	0	60	165	3	1	0	0	4	0	1	113	0	0	0	0	0	1	0	0	0	0	0	0	1	0	0	11	0
DENOVO122	Bacteria;Firmicutes;Clostridia;Clostridiales;Clostridiales_Family_XIII._Incertae_Sedis	0	0	0	0	0	27	3	1	1	1	0	36	6	0	124	2	2	0	0	2	0	30	31	1	0	1	2	9	7	5	44	1	1	2	3	5	0	53	6	0	1	5	3	0	3	6	1	0
DENOVO123	Bacteria;Firmicutes;Clostridia;Clostridiales;Lachnospiraceae	22	0	1	8	0	45	40	0	0	0	0	0	2	2	70	0	3	0	0	0	0	3	10	1	3	1	0	23	0	10	14	0	1	1	0	14	0	101	6	0	0	2	0	0	1	8	0	1
DENOVO124	Bacteria;Firmicutes;Clostridia;Clostridiales;Clostridiales_Family_XIII._Incertae_Sedis	0	0	0	0	0	0	1	0	0	0	0	0	0	0	6	1	0	0	0	10	0	0	0	0	0	0	0	7	0	0	0	1	0	0	0	6	0	0	0	0	5	0	0	0	0	0	15	3
DENOVO125	Bacteria;Chloroflexi;Anaerolineae;Anaerolineales;Anaerolineaceae;Flexilinea;Flexilinea_flocculi	14	0	0	44	0	1	2	2	0	0	0	0	0	0	34	3	0	0	0	43	0	0	1	1	0	0	0	13	0	1	10	0	6	0	1	8	2	3	3	0	15	3	0	1	0	36	8	9
DENOVO126	Unclassified	12	0	1	0	0	0	17	67	33	0	0	0	0	0	0	115	44	0	0	0	0	0	0	23	43	3	1	8	0	2	0	39	84	2	2	20	5	0	0	115	15	0	0	0	1	1	0	48
DENOVO127	Bacteria;Firmicutes;Clostridia;Clostridiales;Lachnospiraceae;Cellulosilyticum	0	2	1	0	0	112	0	0	0	0	1	0	0	2	2	0	0	0	0	0	0	0	0	0	0	0	0	0	0	13	0	0	0	0	0	0	0	86	0	0	0	0	0	0	0	0	0	0
DENOVO128	Bacteria;Firmicutes;Clostridia;Clostridiales	0	278	87	0	141	0	0	0	0	300	171	0	479	0	0	0	0	142	197	0	267	0	0	0	0	225	135	0	276	205	0	0	0	255	126	0	418	0	0	0	0	159	106	0	158	0	0	0
DENOVO129	Unclassified	0	173	60	0	51	0	0	0	0	153	76	0	184	0	0	0	0	12	7	0	14	0	0	0	0	3	3	0	6	8	2	0	0	165	115	0	22	0	0	0	0	11	20	0	26	0	0	0
DENOVO130	Archaea;Euryarchaeota;Methanobacteria;Methanobacteriales;Methanobacteriaceae;Methanobrevibacter	6	1	0	3	1	8	77	17	0	0	4	18	4	0	77	11	1	0	2	38	1	105	92	27	0	0	1	22	1	9	58	8	1	1	0	0	6	36	6	16	0	0	0	4	1	324	191	18
DENOVO131	Bacteria;Bacteroidetes;Bacteroidia;Bacteroidales;Prevotellaceae;Alloprevotella;Alloprevotella_rava	0	0	0	0	0	0	0	0	0	0	0	0	0	0	0	0	1	0	0	0	0	0	0	0	0	0	0	0	0	0	0	0	0	0	0	0	0	0	0	0	1	0	0	0	0	0	0	2
DENOVO132	Unclassified	45	21	2	2	3	104	180	16	0	0	1	0	0	0	14	4	3	0	0	0	0	0	0	1	4	0	0	33	2	2	0	0	22	2	0	19	2	218	46	3	0	5	2	1	2	11	0	0
DENOVO133	Unclassified	4	0	0	6	0	43	13	1	0	0	1	11	1	2	114	1	0	0	0	0	1	88	121	2	1	0	0	2	2	33	147	0	1	0	0	1	0	34	1	0	0	0	0	2	0	7	8	0
DENOVO134	Bacteria;Firmicutes;Clostridia;Clostridiales;Ruminococcaceae;Anaeromassilibacillus;Anaeromassilibacillus_senegalensis	0	120	16	0	27	0	0	0	0	55	75	0	114	0	0	0	0	58	91	0	132	0	0	0	0	33	21	0	47	56	0	0	0	29	8	0	66	0	0	0	0	51	32	0	38	0	0	0
DENOVO135	Bacteria;Firmicutes;Bacilli;Lactobacillales;Enterococcaceae;Enterococcus	0	0	0	0	0	0	0	0	0	0	0	0	0	5	40	0	0	0	0	33	0	0	0	0	0	0	0	0	0	0	0	0	0	0	0	0	0	0	0	0	0	0	0	0	0	47	0	0
DENOVO136	Unclassified	15	23	4	0	11	0	3	26	0	0	0	0	0	0	0	1	40	0	0	1	0	3	0	35	0	0	0	0	0	0	0	0	0	0	0	0	1	0	0	0	1	6	3	0	3	0	0	4
DENOVO137	Unclassified	5	12	0	13	1	2	21	0	0	0	0	76	1	0	6	1	0	0	0	22	1	0	64	0	0	0	2	3	0	0	37	0	0	1	2	10	2	10	1	0	0	4	0	35	0	4	12	0
DENOVO138	Bacteria;Firmicutes;Clostridia;Clostridiales;Lachnospiraceae;Anaerobutyricum;Anaerobutyricum_hallii	0	0	0	3	0	14	11	0	0	0	0	0	0	2	138	0	0	0	2	0	0	31	114	0	0	0	1	0	0	6	45	0	2	1	0	1	1	32	26	0	2	0	2	0	1	9	0	0
DENOVO139	Unclassified	20	4	0	6	0	6	7	2	5	0	0	1	4	0	134	0	16	0	0	0	0	14	44	7	2	0	0	36	5	6	58	1	0	0	0	31	2	18	1	1	0	0	0	0	0	12	1	1
DENOVO140	Unclassified	1	0	0	2	1	4	18	1	0	0	0	215	0	0	8	0	0	0	0	0	2	17	39	1	0	0	0	100	0	18	105	0	0	0	0	6	0	28	10	0	1	0	0	273	0	9	1	0
DENOVO141	Bacteria;Firmicutes;Clostridia;Clostridiales;Clostridiaceae;Clostridium	0	0	0	0	0	165	0	0	0	0	1	0	0	51	22	0	0	0	3	0	0	1	0	0	0	0	0	0	0	7	0	0	0	0	0	0	5	46	0	0	0	0	0	0	0	0	0	0
DENOVO142	Bacteria;Synergistetes;Synergistia;Synergistales;Synergistaceae	13	6	3	0	3	5	105	11	2	1	1	4	0	0	12	3	0	0	0	10	0	0	2	2	2	0	0	5	16	2	0	4	10	10	0	3	3	24	0	6	9	6	1	0	2	419	232	32
DENOVO143	Bacteria;Firmicutes;Clostridia;Clostridiales	0	0	0	0	0	0	0	0	13	0	0	0	0	0	0	15	8	0	0	0	0	0	0	7	107	0	0	0	0	0	0	44	0	0	0	0	0	0	0	0	12	0	0	0	0	0	0	24
DENOVO144	Unclassified	0	70	40	0	63	0	0	0	0	0	0	0	1	0	0	0	0	0	0	0	0	0	0	0	0	0	0	0	0	0	0	0	0	5	6	0	0	0	0	0	0	0	0	0	0	0	0	0
DENOVO145	Unclassified	0	0	1	47	0	0	29	1	7	0	1	96	1	0	7	4	3	0	0	29	0	0	0	4	3	1	0	11	3	0	2	7	3	0	1	2	0	2	0	0	5	5	4	9	3	12	14	4
DENOVO146	Archaea;Euryarchaeota;Methanobacteria;Methanobacteriales;Methanobacteriaceae;Methanobrevibacter	0	0	0	1	0	1	8	1	0	0	0	5	1	1	14	0	0	0	0	14	0	6	14	0	1	0	0	10	0	5	12	1	0	0	0	5	1	64	33	0	0	0	0	0	1	52	22	0
DENOVO147	Unclassified	15	0	0	1	0	0	0	13	9	0	0	0	0	0	0	8	3	0	0	0	0	0	0	2	22	0	0	7	0	0	0	14	6	0	0	4	0	0	0	8	35	0	0	0	0	0	0	25
DENOVO148	Bacteria;Firmicutes;Clostridia;Clostridiales;Lachnospiraceae	2	2	0	2	0	36	29	1	0	0	0	0	3	2	333	1	0	0	0	30	0	0	0	0	0	0	0	2	0	11	15	0	0	0	0	1	6	103	21	1	0	1	3	0	0	66	18	2
DENOVO149	Bacteria;Firmicutes;Clostridia;Clostridiales	21	52	11	3	23	14	15	5	9	25	17	0	93	0	69	5	12	23	40	0	46	1	3	10	19	19	17	36	22	17	24	7	3	26	8	4	31	24	0	4	8	18	11	0	9	14	0	2
DENOVO150	Unclassified	5	3	0	0	0	0	47	33	12	2	0	0	5	0	0	25	36	0	0	0	0	0	0	40	22	2	1	4	1	3	0	39	15	1	5	2	0	0	0	29	10	13	12	0	13	0	0	49
DENOVO151	Bacteria;Firmicutes;Clostridia;Clostridiales;Oscillospiraceae;Oscillibacter;Oscillibacter_valericigenes	0	5	1	0	1	0	0	0	0	48	19	0	20	0	0	0	0	53	30	0	49	0	0	0	0	56	41	0	45	28	0	0	0	7	1	0	32	0	0	0	0	0	0	0	0	0	0	0
DENOVO152	Unclassified	23	0	1	0	1	0	310	116	0	0	0	4	0	0	0	0	2	0	0	38	0	0	0	9	0	1	0	2	0	0	0	3	4	1	1	4	0	0	0	1	14	1	0	0	0	1	0	32
DENOVO153	Unclassified	0	0	3	0	0	0	0	0	0	57	98	0	147	0	0	0	0	5	2	0	10	0	2	0	0	2	4	0	5	6	0	0	0	0	0	0	33	0	0	0	0	0	4	0	5	0	0	0
DENOVO154	Unclassified	31	0	0	0	0	0	10	96	17	2	2	17	0	0	2	64	44	0	0	0	0	0	0	14	26	2	0	4	6	0	0	15	83	1	0	11	0	0	0	91	26	2	0	0	1	1	0	69
DENOVO155	Bacteria;Firmicutes;Clostridia;Clostridiales;Lachnospiraceae;Butyrivibrio	12	0	0	62	0	0	1	2	6	0	0	2	0	0	0	6	7	0	0	46	0	0	0	3	3	0	0	25	0	0	0	3	2	0	0	3	0	0	0	3	8	0	0	0	0	5	0	20
DENOVO156	Bacteria;Verrucomicrobia;Verrucomicrobiae;Verrucomicrobiales;Akkermansiaceae;Akkermansia;Akkermansia_glycaniphila	0	55	36	0	19	0	0	0	0	117	97	0	123	0	0	0	0	31	31	0	41	0	0	0	0	38	55	0	16	13	0	0	0	109	61	0	13	0	0	0	0	29	13	0	9	0	0	0
DENOVO157	Unclassified	102	1	3	39	2	12	190	13	1	0	1	0	1	1	56	0	5	0	0	16	0	0	2	4	3	0	1	12	0	5	25	1	4	2	1	21	0	59	5	2	6	1	0	0	0	41	12	3
DENOVO158	Bacteria;Proteobacteria;Deltaproteobacteria;Desulfovibrionales;Desulfovibrionaceae;Mailhella;Mailhella_massiliensis	0	44	26	0	23	0	0	0	0	35	67	0	164	0	0	0	0	26	22	0	59	0	0	0	0	40	34	1	42	9	0	0	0	39	29	0	62	0	0	0	0	224	104	0	129	0	0	0
DENOVO159	Unclassified	16	9	2	1	3	43	69	2	0	0	0	11	0	0	5	1	3	0	0	0	0	0	0	0	4	0	0	78	0	0	6	0	7	0	1	4	1	98	18	0	0	5	1	0	0	2	0	0
DENOVO160	Bacteria;Firmicutes;Negativicutes;Acidaminococcales;Acidaminococcaceae;Succiniclasticum;Succiniclasticum_ruminis	8	1	5	0	3	3	210	35	9	0	5	0	5	0	1	26	0	0	0	0	0	0	0	2	6	0	1	20	1	8	0	20	11	4	4	41	0	7	0	10	4	2	1	0	3	124	215	16
DENOVO161	Unclassified	41	147	45	4	36	6	125	7	8	125	105	0	188	0	13	5	8	24	29	48	75	0	0	7	5	27	16	36	96	27	39	1	16	57	31	11	71	27	0	3	2	102	30	0	38	48	11	2
DENOVO162	Bacteria;Firmicutes;Erysipelotrichia;Erysipelotrichales;Erysipelotrichaceae	0	0	0	3	0	11	7	0	0	1	0	2	0	4	67	0	0	0	0	7	0	34	45	1	0	0	0	3	0	7	15	1	0	1	0	2	1	59	0	0	0	0	0	15	0	30	7	1
DENOVO163	Bacteria;Actinobacteria;Coriobacteriia;Coriobacteriales;Atopobiaceae	1	0	0	0	0	21	0	1	1	0	0	0	0	0	78	0	1	0	0	10	0	81	75	0	0	0	0	1	0	7	17	0	0	0	0	0	1	54	4	0	0	0	0	6	0	24	21	0
DENOVO164	Bacteria;Firmicutes;Clostridia;Clostridiales;Ruminococcaceae;Ruminococcus	5	0	0	15	0	1	16	1	0	0	1	112	0	0	8	1	1	0	0	43	0	13	105	0	1	0	0	14	0	0	74	5	3	0	0	18	0	113	46	2	0	0	0	165	0	9	0	0
DENOVO165	Bacteria;Firmicutes;Clostridia;Clostridiales;Lachnospiraceae	0	80	31	0	43	0	0	0	0	33	25	0	59	0	0	0	0	34	35	0	99	0	0	0	0	27	28	0	104	17	0	0	0	48	22	0	213	0	0	0	0	21	15	0	22	0	0	0
DENOVO166	Bacteria;Firmicutes;Clostridia;Clostridiales;Ruminococcaceae;Ruminococcus	7	1	0	4	1	4	19	1	2	0	0	70	0	1	4	0	1	0	1	79	0	1	78	0	4	0	0	17	0	1	46	1	6	0	1	27	2	18	4	0	0	6	0	10	0	24	0	0
DENOVO167	Unclassified	0	0	0	35	0	0	7	0	1	1	0	100	0	2	94	0	2	0	0	196	0	1	28	0	0	0	0	17	0	3	10	0	0	0	0	5	0	6	7	1	1	0	0	298	1	36	95	2
DENOVO168	Bacteria;Actinobacteria;Coriobacteriia;Coriobacteriales;Atopobiaceae;Olsenella	4	1	1	7	0	89	11	1	0	0	0	3	3	5	384	1	1	0	0	20	2	243	119	1	0	1	1	3	5	50	129	0	0	1	0	1	4	93	12	0	0	2	1	2	1	103	34	0
DENOVO169	Bacteria;Firmicutes;Negativicutes;Acidaminococcales;Acidaminococcaceae;Phascolarctobacterium;Phascolarctobacterium_succinatutens	0	0	0	0	0	0	0	0	0	74	44	0	80	0	0	0	0	54	34	0	32	0	0	0	0	33	31	0	48	13	0	0	0	50	30	0	42	0	0	0	0	0	0	0	0	0	0	0
DENOVO170	Bacteria;Firmicutes;Clostridia;Clostridiales	0	4	2	0	5	0	0	0	1	28	27	0	64	0	0	0	0	9	13	0	5	0	0	0	0	33	25	1	63	39	0	0	1	153	33	0	24	0	0	0	0	39	16	0	28	0	0	0
DENOVO171	Unclassified	23	2	0	27	1	39	78	1	2	1	4	27	7	4	168	0	9	1	0	43	1	24	45	7	9	3	0	28	5	40	261	2	6	2	0	2	4	123	8	2	0	0	2	27	2	14	23	0
DENOVO172	Bacteria;Firmicutes;Clostridia;Clostridiales;Lachnospiraceae;Syntrophococcus;Syntrophococcus_sucromutans	3	0	1	1	0	42	9	1	0	0	0	0	6	0	49	1	5	0	0	6	0	32	24	0	5	0	0	5	0	12	39	0	0	0	0	10	2	42	1	0	0	0	0	0	0	6	1	0
DENOVO173	Unclassified	0	0	0	0	0	0	0	0	0	0	0	0	0	0	0	0	0	16	12	0	17	0	0	0	0	3	2	0	13	6	0	0	0	0	0	0	13	0	0	0	0	29	50	0	63	0	0	0
DENOVO174	Unclassified	0	0	0	0	0	0	0	0	0	0	0	0	0	0	0	0	0	18	12	0	14	0	0	0	0	0	0	0	0	0	0	0	0	0	0	0	0	0	0	0	0	0	0	0	1	0	0	0
DENOVO175	Unclassified	17	2	2	0	3	0	21	25	11	0	0	0	0	0	0	16	493	0	0	0	0	0	0	176	6	0	1	1	8	1	0	5	51	2	3	28	4	1	2	20	5	0	0	0	0	0	0	5
DENOVO176	Bacteria;Proteobacteria;Betaproteobacteria;Rhodocyclales;Zoogloeaceae;Thauera	3	0	0	0	0	0	41	0	4	0	0	0	0	0	0	1	2	0	0	0	0	0	0	0	0	0	0	0	0	0	0	0	3	0	0	0	0	0	0	0	17	1	0	0	0	391	209	1
DENOVO177	Unclassified	2	0	1	19	0	5	5	0	0	0	0	1	0	0	36	0	0	0	0	16	0	5	2	0	0	0	0	12	0	6	58	0	0	0	0	5	0	12	14	1	2	0	0	223	0	17	0	1
DENOVO178	Unclassified	10	0	1	0	0	0	36	41	4	0	0	0	0	0	3	11	50	0	0	0	0	0	0	9	9	0	0	6	0	0	0	5	6	2	0	0	0	0	0	20	12	0	1	0	2	11	23	25
DENOVO179	Bacteria;Firmicutes;Clostridia;Clostridiales;Ruminococcaceae	0	17	25	0	9	0	0	0	0	40	34	0	74	0	0	0	0	18	17	0	36	0	0	0	0	31	27	0	41	23	0	0	0	24	12	0	32	0	0	0	0	9	11	0	24	0	0	0
DENOVO180	Unclassified	0	15	12	0	11	0	0	0	0	15	15	0	62	0	0	0	1	4	9	0	8	0	0	0	0	3	3	0	1	7	0	0	0	20	13	0	33	0	0	0	0	41	14	0	62	0	0	0
DENOVO181	Bacteria;Firmicutes;Clostridia;Clostridiales;Lachnospiraceae;Moryella;Moryella_indoligenes	10	0	0	0	0	12	202	3	4	0	0	0	0	0	3	0	2	0	0	8	0	0	0	2	14	0	1	20	13	8	0	6	7	3	3	38	0	10	0	5	4	3	0	0	0	69	0	2
DENOVO182	Unclassified	1	0	0	30	0	7	11	0	0	0	1	32	0	3	68	0	0	0	0	40	0	5	23	0	0	0	0	20	2	10	126	0	0	1	1	17	0	49	74	0	1	0	0	54	0	32	28	1
DENOVO183	Unclassified	0	81	95	0	34	0	0	0	0	12	15	0	41	0	0	0	0	32	7	0	66	0	0	0	0	12	20	0	10	21	0	0	0	50	34	0	86	0	0	0	0	140	17	0	24	0	0	0
DENOVO184	Bacteria;Verrucomicrobia;Verrucomicrobiae;Verrucomicrobiales;Akkermansiaceae;Akkermansia;Akkermansia_glycaniphila	0	50	99	0	86	0	0	0	0	11	7	0	8	0	0	0	0	17	18	0	6	0	0	0	0	7	7	0	12	9	0	0	0	18	9	0	15	0	0	0	0	3	0	0	0	0	0	0
DENOVO185	Unclassified	7	0	0	39	0	3	26	0	1	0	0	88	0	1	67	0	1	0	0	132	0	19	51	0	0	0	1	47	4	29	154	0	0	2	0	20	0	65	54	1	0	0	0	107	2	26	127	0
DENOVO186	Unclassified	0	0	0	0	0	0	0	0	0	0	0	0	0	0	0	0	0	0	0	0	0	0	0	0	0	0	0	0	0	0	0	0	0	0	0	0	0	0	0	0	0	0	0	0	0	0	0	0
DENOVO187	Unclassified	5	0	0	0	0	3	31	3	1	0	0	250	0	0	29	0	2	0	0	0	0	10	0	0	8	0	0	41	0	2	308	1	3	1	0	5	2	1	2	0	1	1	1	8	0	17	10	0
DENOVO188	Unclassified	80	2	0	0	1	0	3	92	49	0	0	0	0	0	2	81	63	0	0	1	0	0	0	14	28	0	0	6	0	0	0	17	95	0	0	17	0	6	0	48	83	0	0	0	0	0	0	60
DENOVO189	Unclassified	45	1	0	247	0	2	34	11	4	0	1	0	0	0	24	1	3	0	0	16	0	0	4	0	5	0	0	27	0	4	34	1	8	2	0	15	0	8	2	3	0	0	0	0	1	4	8	1
DENOVO190	Unclassified	0	0	0	0	0	0	0	0	0	0	0	0	0	0	0	1	38	0	0	0	0	0	0	18	0	0	0	1	0	0	0	0	0	0	0	0	0	0	0	0	0	0	0	0	0	0	0	0
DENOVO191	Bacteria;Firmicutes;Clostridia;Clostridiales	0	202	75	0	45	0	0	0	0	57	51	0	128	0	0	0	0	26	12	0	54	0	0	0	0	55	22	0	22	24	0	0	0	84	41	0	21	0	0	0	0	18	12	0	8	0	0	0
DENOVO192	Unclassified	0	0	0	39	0	1	17	12	6	0	0	53	0	0	13	3	1	0	0	0	0	42	52	3	4	1	1	29	0	12	56	5	4	0	0	1	0	21	2	4	0	0	0	22	0	4	0	1
DENOVO193	Unclassified	0	0	0	0	0	0	7	2	5	0	0	28	0	0	0	11	1	0	0	0	0	0	0	1	0	0	0	0	0	0	0	1	1	0	0	0	0	0	0	1	16	0	0	0	0	7	0	15
DENOVO194	Bacteria;Firmicutes;Clostridia;Clostridiales;Unclassified;Intestinimonas;Intestinimonas_butyriciproducens	0	43	32	0	26	0	0	0	0	30	30	0	57	0	0	0	0	5	18	0	34	0	0	0	0	16	21	0	18	23	0	0	0	15	19	0	72	0	0	0	0	35	24	0	40	0	0	0
DENOVO195	Unclassified	9	0	1	0	1	0	0	12	6	0	0	4	0	0	10	10	16	1	0	12	0	1	1	8	3	0	0	0	0	0	3	3	10	0	0	6	0	0	0	10	6	0	0	20	0	0	0	7
DENOVO196	Bacteria;Firmicutes;Clostridia;Clostridiales;Lachnospiraceae	32	1	1	0	2	12	344	3	3	0	0	0	0	0	1	3	2	0	0	0	0	0	0	2	10	0	0	27	0	6	0	2	6	4	3	16	0	25	0	1	3	0	0	0	3	146	56	5
DENOVO197	Bacteria;Proteobacteria;Deltaproteobacteria;Desulfovibrionales;Desulfovibrionaceae;Desulfovibrio	12	6	3	0	3	2	58	1	2	6	5	0	2	0	16	7	6	0	0	0	0	0	0	1	8	1	1	10	2	8	0	8	4	5	1	4	4	1	0	0	2	2	2	0	3	104	106	0
DENOVO198	Bacteria;Firmicutes;Clostridia;Clostridiales;Ruminococcaceae;Ruminococcus;Ruminococcus_flavefaciens	1	0	0	0	0	3	11	6	0	1	0	82	0	0	2	0	6	0	0	6	0	3	53	16	2	0	0	0	0	1	58	2	9	0	0	15	0	13	12	1	0	0	0	3	0	9	0	2
DENOVO199	Bacteria;Firmicutes;Clostridia;Clostridiales;Lachnospiraceae	8	0	0	2	0	28	14	0	0	0	0	10	0	0	15	0	2	0	0	0	0	44	18	0	5	0	0	8	0	8	6	1	1	0	0	12	0	57	6	0	1	0	0	0	0	0	11	0
DENOVO200	Bacteria;Firmicutes;Clostridia;Clostridiales;Ruminococcaceae;Ruminococcus	4	0	1	7	0	1	1	12	6	0	0	9	0	0	1	18	12	0	0	53	2	0	0	7	26	0	0	11	0	0	7	28	12	0	0	65	0	0	6	2	21	0	0	0	0	15	0	19
DENOVO201	Unclassified	0	0	1	0	0	1	0	0	0	0	0	26	0	0	0	0	0	0	0	0	0	5	19	0	0	0	0	4	0	0	0	0	0	0	0	2	0	32	12	0	0	0	0	109	0	8	0	0
DENOVO202	Bacteria;Firmicutes;Clostridia;Clostridiales;Clostridiales_Family_XIII._Incertae_Sedis;Mogibacterium	5	0	0	0	0	24	20	1	0	0	0	140	0	1	63	1	2	0	0	21	0	36	76	0	1	0	0	15	8	19	26	2	0	1	0	11	1	31	5	0	2	0	0	47	0	9	3	0
DENOVO203	Unclassified	0	0	0	154	0	0	0	0	0	0	0	1	0	0	4	0	0	0	0	0	0	0	0	0	0	0	0	125	0	0	0	0	0	0	0	0	2	0	0	0	2	0	0	0	1	2	0	1
DENOVO204	Bacteria;Verrucomicrobia;Verrucomicrobiae;Verrucomicrobiales;Akkermansiaceae;Akkermansia;Akkermansia_glycaniphila	0	39	59	0	51	0	0	0	0	31	37	0	40	0	0	0	0	15	15	0	24	0	0	0	0	23	22	0	35	10	0	0	0	82	112	0	2	0	0	0	0	0	0	0	0	0	0	0
DENOVO205	Unclassified	3	0	0	14	2	39	58	0	1	0	4	6	0	1	178	2	5	0	0	4	1	55	97	3	5	0	1	5	1	15	80	0	5	0	0	9	3	118	21	2	0	0	0	15	0	18	5	0
DENOVO206	Bacteria;Firmicutes;Clostridia;Clostridiales;Eubacteriaceae;Eubacterium	0	0	0	0	1	13	3	0	0	1	0	0	0	0	28	0	0	0	0	46	0	0	0	0	0	0	0	0	0	2	38	0	0	2	0	0	1	33	10	0	0	0	0	0	1	19	0	2
DENOVO207	Bacteria;Firmicutes;Clostridia;Clostridiales;Lachnospiraceae;Lachnoclostridium	19	4	1	0	0	9	225	20	9	0	0	0	0	0	0	8	1	0	0	0	0	0	0	1	7	0	0	28	0	2	0	3	15	4	0	23	1	26	0	3	0	0	1	0	0	15	0	1
DENOVO208	Unclassified	27	0	0	2	0	0	0	45	20	1	0	0	0	0	2	39	10	0	0	0	1	0	2	6	4	0	0	0	0	0	0	7	30	0	0	0	0	0	0	19	32	0	0	0	0	0	0	33
DENOVO209	Unclassified	0	0	0	59	1	4	0	0	0	0	1	381	0	0	35	0	0	0	0	11	2	5	57	0	2	0	0	55	4	31	221	0	1	0	0	5	0	29	31	0	0	0	0	376	0	5	16	2
DENOVO210	Bacteria;Bacteroidetes;Bacteroidia;Bacteroidales;Rikenellaceae;Alistipes	0	191	31	0	33	0	0	0	0	45	57	0	75	0	0	0	0	7	9	0	23	0	0	0	0	12	2	0	12	1	0	0	0	32	53	0	59	0	0	0	0	27	29	0	53	0	0	0
DENOVO211	Unclassified	3	0	0	0	0	0	17	9	12	1	0	0	3	0	1	30	1	0	0	0	0	0	0	2	4	0	1	2	0	0	0	3	12	0	0	0	0	0	0	6	27	0	0	0	0	0	0	26
DENOVO212	Unclassified	0	0	0	8	0	1	0	3	0	0	0	0	0	0	15	0	0	0	0	84	0	0	10	0	0	0	0	10	0	0	0	0	0	0	0	5	0	8	1	0	0	0	0	10	0	1	36	2
DENOVO213	Unclassified	0	0	0	0	0	0	0	0	0	0	0	0	0	0	0	0	0	13	13	0	20	0	0	0	0	50	44	0	73	175	0	0	0	0	0	0	5	0	0	0	0	0	0	0	1	0	0	0
DENOVO214	Unclassified	50	5	1	117	0	12	55	4	0	0	0	0	0	0	20	0	7	0	0	5	0	0	0	1	5	0	1	7	1	44	21	2	2	0	0	5	0	9	1	0	2	0	0	0	0	21	2	0
DENOVO215	Unclassified	1	2	0	2	0	0	5	0	1	0	1	26	0	0	18	0	0	0	0	26	0	10	37	1	0	0	0	4	0	1	50	0	0	0	0	1	0	3	4	0	0	0	0	73	1	0	0	0
DENOVO216	Bacteria;Firmicutes;Clostridia;Clostridiales	27	0	0	0	0	2	1	2	3	0	1	0	1	0	18	3	7	0	0	0	0	0	14	8	4	0	0	5	0	0	0	2	11	0	0	130	0	15	0	1	2	3	0	0	0	12	0	2
DENOVO217	Bacteria;Firmicutes;Clostridia;Clostridiales;Lachnospiraceae	13	0	0	0	0	0	24	0	2	0	0	0	0	0	0	1	42	0	0	0	8	0	0	27	4	1	0	89	0	0	0	2	2	3	1	28	0	0	0	0	2	1	0	0	1	50	0	7
DENOVO218	Bacteria;Firmicutes;Clostridia;Clostridiales;Eubacteriaceae;Eubacterium;Eubacterium_coprostanoligenes	24	17	15	0	11	1	23	5	1	64	45	8	144	0	0	0	0	43	36	0	102	0	0	0	1	43	29	1	65	39	0	1	4	45	20	8	102	0	0	2	1	3	12	0	12	0	0	0
DENOVO219	Bacteria;Lentisphaerae;Lentisphaeria;Victivallales;Victivallaceae;Victivallis;Victivallis_vadensis	0	8	5	0	1	0	0	0	0	0	6	0	9	0	0	0	0	1	0	0	4	1	1	0	2	2	2	2	0	12	70	2	0	1	0	0	10	0	0	0	0	7	10	0	4	5	0	0
DENOVO220	Bacteria;Proteobacteria;Gammaproteobacteria;Xanthomonadales;Xanthomonadaceae;Stenotrophomonas;Stenotrophomonas_rhizophila	0	0	0	0	0	0	0	0	0	0	0	0	0	0	0	0	0	0	0	0	0	0	0	0	0	0	0	0	0	0	8	0	0	0	0	0	0	0	0	0	0	0	0	0	0	18	0	0
DENOVO221	Bacteria;Chlamydiae;Chlamydiia;Chlamydiales;Chlamydiaceae;Chlamydia;Chlamydia_pecorum	0	0	0	0	0	0	0	0	0	0	0	0	0	0	0	0	0	0	0	0	0	41	0	0	0	0	0	0	0	0	0	0	0	0	0	0	0	0	0	0	0	0	0	0	0	0	0	0
DENOVO222	Bacteria;Firmicutes;Clostridia;Clostridiales;Clostridiales_Family_XIII._Incertae_Sedis	0	0	0	5	0	6	5	0	0	0	0	59	0	1	67	0	0	0	0	19	0	6	44	0	2	1	0	4	0	5	17	0	1	0	0	34	0	13	9	1	0	6	0	18	0	6	0	0
DENOVO223	Bacteria;Firmicutes;Clostridia;Clostridiales	6	0	0	0	0	0	0	18	9	0	0	0	0	0	0	5	3	0	0	0	0	0	0	3	10	0	0	2	0	0	0	15	1	0	1	1	0	0	0	2	15	0	0	0	0	0	0	44
DENOVO224	Unclassified	0	2	0	0	0	0	0	0	0	3	4	0	13	0	0	0	0	0	0	0	0	0	0	0	0	0	0	0	0	0	0	0	0	38	24	0	0	0	0	0	0	0	0	0	0	0	0	0
DENOVO225	Bacteria;Bacteroidetes;Bacteroidia;Bacteroidales;Prevotellaceae;Alloprevotella;Alloprevotella_rava	0	2	8	0	8	0	0	0	0	0	1	0	0	0	0	0	0	35	20	0	45	0	1	0	0	5	7	0	7	2	0	0	0	0	0	0	3	0	0	0	0	20	15	0	8	0	0	0
DENOVO226	Unclassified	1	0	0	0	0	10	20	1	1	0	0	0	0	0	0	2	0	0	0	0	0	0	0	0	3	0	0	0	0	0	1	1	9	0	0	6	0	114	26	2	3	0	0	0	0	0	0	0
DENOVO227	Bacteria;Elusimicrobia;Elusimicrobia;Elusimicrobiales;Elusimicrobiaceae;Elusimicrobium;Elusimicrobium_minutum	0	0	0	0	0	7	21	3	7	0	0	0	6	3	56	4	2	0	0	0	0	1	0	5	0	0	0	6	0	3	0	4	0	3	0	1	0	0	0	0	14	2	0	0	0	157	248	51
DENOVO228	Bacteria;Firmicutes;Clostridia;Clostridiales;Lachnospiraceae	20	1	0	33	0	3	77	16	4	0	0	0	0	0	4	4	9	0	0	0	0	0	0	7	3	1	0	20	0	1	0	2	17	0	0	4	0	9	2	4	3	6	1	0	0	8	10	10
DENOVO229	Unclassified	14	0	0	26	0	14	6	1	0	0	0	0	0	1	32	0	0	0	0	0	0	0	1	0	3	0	0	6	0	13	131	2	5	0	0	29	0	56	14	2	0	0	0	7	0	0	0	0
DENOVO230	Unclassified	2	4	0	0	3	20	53	4	3	0	0	11	1	2	29	4	4	1	0	0	0	8	0	2	6	0	0	6	0	2	0	6	14	1	2	6	2	69	8	4	0	1	1	28	1	0	0	0
DENOVO231	Bacteria;Elusimicrobia;Elusimicrobia;Elusimicrobiales;Elusimicrobiaceae;Elusimicrobium;Elusimicrobium_minutum	0	0	0	0	0	18	35	2	1	0	1	0	0	2	27	5	2	0	0	0	0	30	0	2	7	0	0	2	0	2	0	3	1	0	0	0	0	21	6	0	1	0	1	0	1	40	18	2
DENOVO232	Bacteria;Bacteroidetes;Bacteroidia;Bacteroidales;Prevotellaceae;Prevotella	0	0	0	0	0	0	0	0	1	0	0	0	0	0	0	1	1	0	0	0	0	0	0	6	0	1	0	0	0	0	0	1	0	0	0	0	0	0	0	0	0	4	0	0	1	1	0	0
DENOVO233	Unclassified	0	27	10	0	4	0	0	0	0	32	27	0	64	0	0	0	0	14	17	0	22	0	0	0	0	60	72	0	50	26	0	0	0	47	28	0	2	0	0	0	0	0	0	0	0	0	0	0
DENOVO234	Bacteria;Spirochaetes;Spirochaetia;Spirochaetales;Spirochaetaceae;Treponema;Treponema_bryantii	0	27	19	0	3	0	0	0	0	11	4	3	18	0	0	0	0	8	3	0	30	0	0	0	0	1	2	0	16	2	0	0	0	49	13	0	94	0	0	0	0	22	49	0	37	0	0	0
DENOVO235	Bacteria;Firmicutes;Clostridia;Clostridiales;Clostridiales_Family_XIII._Incertae_Sedis	0	0	0	0	0	4	9	0	0	1	0	64	0	0	24	1	0	0	0	0	0	12	16	0	0	0	0	12	0	1	16	0	0	0	0	2	0	8	0	0	0	1	1	59	0	17	2	1
DENOVO236	Bacteria;Bacteroidetes;Bacteroidia;Bacteroidales;Prevotellaceae;Prevotella	0	0	0	0	0	0	0	0	0	0	0	0	0	0	0	0	211	0	0	0	0	0	0	293	0	0	0	0	0	0	0	0	0	0	0	0	0	0	0	0	0	0	0	0	0	0	0	0
DENOVO237	Bacteria;Firmicutes;Clostridia;Clostridiales;Lachnospiraceae	9	0	1	280	0	1	62	17	2	0	0	0	0	0	3	2	12	0	0	0	1	0	0	13	1	0	0	43	0	0	0	1	8	1	1	1	1	0	0	3	1	1	0	0	1	2	0	1
DENOVO238	Bacteria;Firmicutes;Clostridia;Clostridiales;Ruminococcaceae	2	3	0	0	0	2	1	0	2	0	1	0	2	1	48	1	1	0	0	0	0	4	14	1	4	1	0	14	4	3	28	2	0	0	0	6	0	14	3	0	0	1	0	2	0	15	67	0
DENOVO239	Unclassified	0	0	0	0	0	0	0	0	0	0	0	8	0	0	0	0	0	0	0	45	0	0	0	0	0	0	0	0	0	0	0	0	0	0	0	0	0	0	0	0	0	0	0	0	0	4	0	0
DENOVO240	Unclassified	59	0	0	1	0	0	0	268	32	0	0	0	0	0	0	135	2	0	0	0	0	0	0	0	0	0	0	0	0	0	0	0	0	0	0	0	0	0	0	0	1	1	0	0	0	0	0	0
DENOVO241	Bacteria;Proteobacteria;Deltaproteobacteria;Desulfovibrionales;Desulfovibrionaceae;Desulfovibrio;Desulfovibrio_piger	0	2	1	0	2	0	0	0	0	24	32	0	48	0	0	0	0	0	0	0	0	0	0	0	0	0	0	0	0	0	0	0	0	8	5	0	4	0	0	0	0	0	0	0	0	0	0	0
DENOVO242	Unclassified	11	2	0	22	0	0	12	1	0	0	0	269	5	0	1	1	0	0	0	32	0	0	28	0	0	0	0	24	0	0	19	0	0	1	0	30	24	6	0	0	1	0	0	111	0	1	0	0
DENOVO243	Bacteria;Firmicutes;Clostridia;Clostridiales;Lachnospiraceae;Anaerotignum;Anaerotignum_faecicola	0	9	2	0	7	0	0	0	0	55	29	0	58	0	0	0	0	42	33	0	61	0	0	0	0	47	50	0	72	27	0	0	0	15	10	0	17	0	0	0	0	28	23	0	21	0	0	0
DENOVO244	Bacteria;Firmicutes;Clostridia;Clostridiales;Eubacteriaceae;Eubacterium;Eubacterium_coprostanoligenes	0	0	0	4	1	0	0	0	0	0	1	0	1	0	39	0	1	0	0	0	0	0	1	0	3	0	0	2	0	1	0	1	0	0	0	1	0	0	0	0	0	0	0	0	0	0	0	0
DENOVO245	Bacteria;Firmicutes;Clostridia;Clostridiales	0	78	15	0	20	0	0	0	0	6	13	0	30	0	0	0	0	1	0	0	0	0	0	0	0	4	1	0	0	8	0	0	0	10	2	0	20	0	0	0	0	1	4	0	5	0	0	0
DENOVO246	Unclassified	0	0	0	17	0	0	0	0	0	0	0	8	0	1	22	0	0	0	0	0	0	2	36	0	0	0	0	6	0	8	47	0	0	0	0	0	0	0	0	0	0	0	0	15	1	0	0	0
DENOVO247	Unclassified	0	0	0	2	0	0	0	0	0	0	0	0	0	0	0	0	0	0	0	0	0	0	0	0	0	0	0	0	0	0	0	0	0	0	0	0	0	0	0	0	7	0	0	0	0	0	0	2
DENOVO248	Unclassified	0	0	0	21	0	0	0	1	0	0	0	3	0	0	5	1	0	0	0	15	0	0	0	0	0	0	0	9	0	1	7	0	1	0	0	4	0	0	0	0	3	0	3	16	1	9	0	2
DENOVO249	Bacteria;Bacteroidetes;Bacteroidia;Bacteroidales;Bacteroidaceae;Anaerorhabdus;Anaerorhabdus_furcosa	2	0	0	0	0	7	21	0	0	0	0	3	0	0	11	0	0	0	0	22	0	23	38	0	0	0	0	0	0	3	20	0	0	0	0	0	0	0	0	0	0	0	0	4	0	4	12	0
DENOVO250	Bacteria;Proteobacteria;Epsilonproteobacteria;Campylobacterales;Campylobacteraceae;Campylobacter;Campylobacter_gracilis	2	0	0	0	0	0	4	6	2	0	0	0	0	0	0	0	2	1	0	0	0	0	0	8	0	0	0	2	0	0	0	1	2	1	0	0	0	0	0	3	9	0	0	0	1	3	0	30
DENOVO251	Unclassified	0	0	0	2	0	0	0	0	2	0	0	0	0	1	76	1	6	0	0	0	0	5	27	0	3	0	0	17	0	1	0	0	0	0	0	0	0	0	0	0	0	0	0	0	0	0	0	0
DENOVO252	Bacteria;Firmicutes;Negativicutes;Acidaminococcales;Acidaminococcaceae;Succiniclasticum;Succiniclasticum_ruminis	0	0	0	0	0	0	0	0	5	4	0	0	2	0	6	14	6	0	0	0	0	0	0	8	5	1	0	9	5	4	0	13	0	0	0	0	1	0	0	0	0	0	0	0	0	13	17	1
DENOVO253	Bacteria;Bacteroidetes;Bacteroidia;Bacteroidales;Rikenellaceae;Alistipes	0	53	9	0	13	0	0	0	0	31	28	0	21	0	0	0	0	25	13	0	22	0	0	0	0	24	13	0	36	6	0	0	0	29	23	0	29	0	0	0	0	28	13	0	14	0	0	0
DENOVO254	Bacteria;Firmicutes;Clostridia;Clostridiales;Lachnospiraceae	0	18	13	0	23	0	0	0	0	56	23	0	77	0	0	0	0	48	45	0	43	0	0	0	0	36	36	0	74	42	0	0	0	16	6	0	16	0	0	0	0	37	12	0	34	0	0	0
DENOVO255	Unclassified	0	0	0	2	0	0	0	0	0	0	0	122	0	0	7	0	0	0	0	14	0	5	24	0	0	0	0	17	0	4	7	0	0	0	0	1	0	12	6	0	0	0	0	15	0	1	0	0
DENOVO256	Bacteria;Firmicutes;Clostridia;Clostridiales;Lachnospiraceae	3	0	0	0	0	29	25	0	0	0	0	15	0	0	74	1	0	0	0	0	0	36	32	0	0	0	0	1	0	7	16	0	0	0	1	3	0	10	5	0	0	0	0	0	0	2	0	0
DENOVO257	Bacteria;Firmicutes;Clostridia;Clostridiales;Lachnospiraceae;Blautia	9	0	0	3	1	19	11	0	0	0	0	2	0	0	47	0	0	0	0	0	0	2	10	0	0	0	0	3	4	8	15	0	0	0	0	7	0	36	0	2	0	0	0	0	0	0	0	0
DENOVO258	Bacteria;Bacteroidetes;Bacteroidia;Bacteroidales;Prevotellaceae;Prevotella;Prevotella_ruminicola	4	3	2	0	3	0	58	16	6	0	1	0	2	0	0	12	21	0	0	0	3	0	0	42	17	3	0	8	0	1	0	29	8	3	0	2	0	0	0	1	5	2	0	0	0	3	40	3
DENOVO259	Unclassified	34	9	0	0	0	0	7	131	37	0	0	0	0	0	0	112	96	0	0	0	3	0	0	42	49	0	1	8	3	0	0	42	29	1	2	4	1	0	0	25	38	0	1	0	0	2	0	96
DENOVO260	Bacteria;Firmicutes;Clostridia;Clostridiales;Ruminococcaceae;Ethanoligenens;Ethanoligenens_harbinense	0	36	19	5	20	0	0	15	2	27	25	0	49	0	1	4	10	22	24	11	84	0	0	12	11	24	17	18	48	71	0	11	5	39	17	7	52	0	0	6	2	33	19	0	10	4	0	21
DENOVO261	Unclassified	0	0	0	0	0	0	0	0	0	0	0	0	0	0	0	1	0	0	0	0	0	0	0	1	0	0	0	2	0	0	0	1	0	0	0	0	0	0	0	0	0	0	0	0	0	0	0	0
DENOVO262	Unclassified	13	0	0	0	0	0	3	8	7	0	0	0	0	0	1	17	2	0	0	0	0	0	0	2	0	0	0	1	0	0	0	0	0	0	0	0	0	0	0	0	31	0	0	0	1	0	0	12
DENOVO263	Bacteria;Bacteroidetes;Bacteroidia;Bacteroidales;Prevotellaceae;Prevotella;Prevotella_buccae	5	0	0	0	0	0	0	13	10	1	0	0	0	0	0	8	9	0	0	0	0	0	0	8	129	0	0	1	0	0	0	156	42	0	0	4	0	0	0	16	4	0	0	0	0	1	0	5
DENOVO264	Unclassified	2	0	0	0	0	0	0	0	5	0	0	0	0	0	0	8	0	0	0	0	0	0	0	0	1	0	0	0	0	0	0	4	1	0	0	0	0	0	0	0	8	0	0	0	0	0	0	11
DENOVO265	Bacteria;Firmicutes;Clostridia;Clostridiales;Oscillospiraceae;Oscillibacter;Oscillibacter_valericigenes	38	16	6	6	3	3	66	99	6	6	5	11	8	0	1	2	16	1	4	75	8	2	14	35	163	4	3	7	14	2	30	86	21	5	2	21	0	28	3	13	1	10	1	2	2	10	0	3
DENOVO266	Bacteria;Firmicutes;Clostridia;Clostridiales	2	0	0	5	1	15	15	0	0	0	0	0	0	1	16	0	0	0	0	3	0	14	26	2	1	0	0	4	0	3	64	1	0	2	0	11	6	48	11	0	0	0	0	30	2	9	14	0
DENOVO267	Bacteria;Firmicutes;Clostridia;Clostridiales;Unclassified;Colidextribacter;Colidextribacter_massiliensis	0	0	0	0	0	0	0	0	1	4	4	43	12	18	246	1	12	3	1	28	9	46	179	4	4	0	1	7	0	2	17	0	1	0	0	4	0	0	0	0	0	0	0	0	0	0	1	1
DENOVO268	Bacteria;Firmicutes;Clostridia;Clostridiales;Lachnospiraceae	34	0	1	0	1	2	161	10	5	0	0	0	2	0	3	4	6	0	0	0	0	0	0	2	9	0	0	37	6	0	0	4	5	2	1	40	1	12	0	3	0	1	0	0	0	2	28	2
DENOVO269	Bacteria;Firmicutes;Clostridia;Clostridiales;Lachnospiraceae	7	0	0	1	1	1	28	0	0	0	0	0	0	0	14	0	3	0	0	0	0	4	10	1	3	1	0	6	0	3	46	0	0	0	0	5	0	3	5	1	0	0	0	0	0	4	0	0
DENOVO270	Unclassified	55	1	0	122	0	0	28	5	3	1	1	0	0	0	2	5	19	1	0	0	0	0	0	6	12	0	0	28	2	1	0	10	14	1	0	3	0	0	0	4	2	0	0	0	0	0	0	4
DENOVO271	Bacteria;Firmicutes;Clostridia;Clostridiales;Clostridiales_Family_XIII._Incertae_Sedis	3	0	0	0	0	1	0	2	1	0	0	0	0	0	19	0	0	0	0	0	0	0	3	0	1	0	0	4	0	1	6	0	10	0	0	28	0	0	0	0	3	0	0	0	0	0	0	0
DENOVO272	Unclassified	18	7	0	0	1	0	50	51	26	1	4	0	1	0	2	21	0	0	0	0	0	0	0	0	32	0	0	0	1	5	0	34	47	1	1	6	0	0	0	20	6	0	0	0	0	0	0	3
DENOVO273	Bacteria;Firmicutes;Clostridia;Clostridiales;Ruminococcaceae;Ruminococcus;Ruminococcus_albus	6	0	1	5	0	1	5	10	5	0	0	58	0	0	4	2	13	0	0	42	0	0	9	16	1	0	0	7	0	0	8	3	3	0	0	18	1	21	2	2	5	0	2	0	0	12	12	3
DENOVO274	Bacteria;Firmicutes;Clostridia;Clostridiales;Clostridiales_Family_XIII._Incertae_Sedis;Unclassified;[Eubacterium]_sulci	0	1	0	1	0	5	1	0	0	0	0	0	0	15	77	0	0	0	0	0	1	8	22	0	1	0	0	3	0	86	18	0	0	0	0	6	0	0	0	0	0	0	0	0	0	8	0	0
DENOVO275	Bacteria;Firmicutes;Clostridia;Clostridiales;Hungateiclostridiaceae;Saccharofermentans;Saccharofermentans_acetigenes	5	9	2	3	2	0	5	10	3	0	0	0	0	0	0	1	5	0	0	0	0	0	0	1	30	1	0	25	0	3	0	15	9	2	0	1	0	0	0	2	3	2	0	0	0	2	0	3
DENOVO276	Bacteria;Spirochaetes;Spirochaetia;Brevinematales;Brevinemataceae;Brevinema;Brevinema_andersonii	0	0	0	0	0	0	0	0	0	0	0	0	0	0	0	0	0	0	0	0	0	285	0	0	0	0	0	0	0	1	3	0	0	0	0	0	0	0	0	0	0	0	0	0	0	64	228	0
DENOVO277	Unclassified	0	0	0	10	0	0	1	0	0	0	0	0	0	1	8	1	1	0	0	20	1	4	6	0	0	0	0	13	0	11	67	1	0	0	0	0	0	0	0	0	1	2	0	0	0	3	5	2
DENOVO278	Unclassified	1	0	0	1	0	7	4	0	0	0	0	23	0	0	3	0	0	0	0	0	0	0	1	1	0	0	0	2	0	0	0	0	1	0	0	0	0	69	22	1	1	0	1	0	0	4	2	0
DENOVO279	Bacteria;Firmicutes;Clostridia;Clostridiales;Clostridiales_Family_XIII._Incertae_Sedis	0	0	0	0	0	12	3	0	0	0	0	7	0	1	35	0	0	0	0	18	0	7	48	0	0	0	1	2	0	2	28	0	0	0	1	4	1	32	1	0	0	0	0	0	0	39	18	2
DENOVO280	Unclassified	0	0	0	0	0	0	11	0	0	0	0	0	0	0	0	0	0	0	0	0	0	0	0	0	0	0	0	0	0	0	10	0	0	0	0	0	0	0	65	0	0	0	0	0	0	0	53	0
DENOVO281	Bacteria;Firmicutes;Clostridia;Clostridiales;Lachnospiraceae;Coprococcus;Coprococcus_catus	4	2	0	1	0	27	10	0	1	1	0	0	3	1	83	0	0	0	0	0	0	24	30	0	1	0	0	2	0	9	20	1	1	1	0	6	0	44	0	0	0	0	1	0	1	3	26	0
DENOVO282	Unclassified	0	0	0	4	0	0	0	0	0	0	0	4	0	0	3	0	0	0	0	24	0	0	1	0	0	0	0	2	0	1	12	0	1	0	0	1	1	0	0	0	0	0	0	132	0	3	1	0
DENOVO283	Bacteria;Firmicutes;Clostridia;Clostridiales	1	0	1	0	0	14	3	2	0	0	0	0	9	0	50	0	0	0	0	0	8	9	6	0	0	0	0	2	19	7	21	0	0	1	0	1	0	21	9	0	0	0	0	0	0	0	0	0
DENOVO284	Bacteria;Firmicutes;Clostridia;Clostridiales	0	0	0	0	0	0	0	0	0	0	0	0	0	1	71	1	0	0	0	0	10	13	114	0	0	0	1	2	0	4	67	0	0	0	0	0	1	0	0	0	0	0	0	0	0	25	17	0
DENOVO285	Bacteria	3	1	0	5	0	28	60	0	0	0	0	0	0	1	18	0	0	0	0	0	0	0	0	0	1	0	0	7	0	11	122	0	0	0	0	8	0	46	12	0	1	0	0	0	0	0	0	0
DENOVO286	Bacteria;Firmicutes;Clostridia;Clostridiales;Ruminococcaceae	9	0	0	0	0	1	23	0	0	0	0	0	0	0	2	0	4	0	0	0	0	1	0	1	0	1	0	0	0	0	9	1	1	0	0	6	0	9	0	1	0	0	0	0	0	2	0	0
DENOVO287	Unclassified	1	0	0	2	0	6	8	0	0	0	1	13	0	1	49	0	0	0	0	0	0	7	36	1	1	0	0	3	0	2	19	0	0	0	0	6	0	8	16	0	0	0	0	0	0	5	0	0
DENOVO288	Bacteria;Firmicutes;Clostridia;Clostridiales;Lachnospiraceae	0	2	0	0	0	6	0	0	1	0	0	0	11	2	43	0	1	0	0	0	7	23	47	0	1	0	2	1	0	7	19	0	0	0	0	5	0	5	0	0	0	0	0	0	0	0	0	0
DENOVO289	Unclassified	1	0	0	23	0	1	0	2	2	2	2	42	0	2	11	0	2	2	0	24	8	0	8	2	1	0	1	66	0	15	94	4	3	2	1	21	1	6	0	1	1	1	0	64	1	4	31	2
DENOVO290	Bacteria;Lentisphaerae;Lentisphaeria;Victivallales;Victivallaceae;Victivallis;Victivallis_vadensis	0	0	0	0	0	1	10	2	2	0	0	46	0	1	73	1	4	1	0	13	0	0	4	2	7	0	0	10	0	2	15	2	2	1	1	7	0	19	6	0	1	1	0	0	0	70	15	1
DENOVO291	Bacteria;Firmicutes;Clostridia;Clostridiales	9	0	0	27	4	6	40	12	5	2	1	0	0	0	78	0	15	0	1	0	0	1	3	4	2	1	0	1	21	3	0	3	22	5	3	13	0	56	11	5	3	0	0	0	0	13	0	7
DENOVO292	Bacteria;Proteobacteria;Betaproteobacteria;Burkholderiales;Comamonadaceae	1	0	0	0	0	0	21	2	2	0	0	0	0	0	2	4	1	0	0	0	0	0	0	1	1	0	0	9	0	0	0	0	3	0	0	0	0	0	0	1	1	2	0	0	0	75	76	3
DENOVO293	Bacteria;Firmicutes;Clostridia;Clostridiales;Lachnospiraceae;Blautia	2	2	0	4	0	59	20	1	0	0	0	0	5	1	86	0	1	1	0	0	0	68	69	0	0	1	0	5	7	28	73	0	0	0	1	3	6	97	6	2	1	0	0	0	0	17	0	1
DENOVO294	Unclassified	0	0	0	47	0	3	7	0	0	0	0	57	0	0	15	0	0	0	0	110	0	0	14	0	0	0	0	10	0	7	19	0	0	0	0	0	0	11	4	0	1	0	0	458	0	24	31	0
DENOVO295	Unclassified	1	0	0	0	0	0	0	0	1	0	0	0	0	0	0	3	0	0	0	0	0	0	0	0	54	0	0	0	0	0	2	68	0	0	1	0	0	0	0	0	0	0	0	0	0	0	0	0
DENOVO296	Bacteria;Firmicutes;Clostridia;Clostridiales	14	0	0	658	0	0	8	5	5	0	0	0	0	0	2	3	2	0	0	10	0	0	0	1	1	0	0	23	0	0	0	0	5	1	0	2	0	0	0	2	1	0	0	0	0	5	0	7
DENOVO297	Unclassified	0	0	0	54	0	0	1	0	1	0	0	0	0	0	2	0	3	0	0	0	0	0	0	1	16	0	0	22	0	1	2	2	0	0	0	0	0	0	0	0	2	0	0	0	0	3	0	0
DENOVO298	Unclassified	1	0	0	0	0	0	0	0	0	0	0	1	0	0	0	0	1	0	0	0	0	0	0	2	0	0	0	0	0	0	0	0	0	0	0	0	0	0	0	0	2	0	0	0	0	0	0	9
DENOVO299	Unclassified	0	0	0	6	0	1	3	0	1	0	1	0	1	0	33	0	0	0	0	33	0	0	0	0	0	0	0	9	0	0	24	0	0	0	0	1	2	2	1	0	0	0	0	2	1	1	0	1
DENOVO300	Unclassified	0	0	0	84	0	0	0	0	0	0	0	0	0	0	6	0	1	0	0	0	0	0	5	0	0	0	0	9	0	0	0	0	0	0	0	0	0	0	0	0	0	0	0	0	0	0	0	0
DENOVO301	Bacteria;Firmicutes;Clostridia;Clostridiales	3	0	1	0	3	0	14	24	3	0	0	0	0	0	1	15	4	0	0	0	0	0	0	9	9	0	0	1	0	1	0	17	24	0	0	1	0	0	0	6	17	0	0	0	1	0	0	28
DENOVO302	Unclassified	0	0	0	0	0	0	0	1	0	0	0	0	0	0	7	0	2	0	0	0	0	0	4	1	0	0	0	6	0	0	0	0	0	0	0	8	0	13	0	0	0	0	0	0	0	2	44	3
DENOVO303	Bacteria;Firmicutes;Clostridia;Clostridiales	4	0	0	14	0	13	6	1	1	1	2	0	1	0	109	1	3	2	1	0	0	6	26	0	1	0	0	3	5	3	94	1	0	0	0	3	0	30	2	0	1	0	0	0	0	0	21	0
DENOVO304	Bacteria;Bacteroidetes;Bacteroidia;Bacteroidales;Rikenellaceae;Alistipes;Alistipes_putredinis	0	0	0	0	0	0	0	0	0	2	2	0	3	0	0	0	0	15	8	0	16	0	0	0	0	56	30	0	89	11	0	0	0	1	0	0	0	0	0	0	0	2	0	0	0	0	0	0
DENOVO305	Bacteria;Bacteroidetes;Bacteroidia;Bacteroidales;Prevotellaceae;Prevotella;Prevotella_ruminicola	12	0	0	0	0	0	48	49	15	0	0	0	3	0	1	65	83	0	0	3	0	0	0	184	35	0	0	6	0	1	0	40	20	1	0	7	0	0	0	20	9	2	1	0	1	2	0	42
DENOVO306	Unclassified	0	0	0	0	0	0	0	0	54	0	0	0	0	1	1	282	0	0	0	0	0	0	0	0	0	0	0	0	0	0	0	0	0	0	0	0	0	0	0	0	0	0	0	0	0	0	0	4
DENOVO307	Unclassified	0	8	8	0	7	0	0	0	0	18	23	0	74	0	0	0	0	32	21	0	72	0	0	0	0	44	23	0	32	51	0	0	0	22	11	0	111	0	0	0	0	25	12	0	3	0	0	0
DENOVO308	Bacteria;Fibrobacteres;Fibrobacteria;Fibrobacterales;Fibrobacteraceae;Fibrobacter;Fibrobacter_succinogenes	12	6	4	0	4	0	1	15	11	61	65	0	123	0	1	20	1	0	0	0	0	0	0	2	1	0	0	0	0	0	2	6	14	24	16	5	385	0	0	4	0	317	121	0	142	0	0	0
DENOVO309	Unclassified	17	0	0	0	0	0	2	14	7	0	0	0	0	0	2	5	16	0	0	23	0	0	0	10	20	0	0	3	0	0	0	7	8	0	0	4	0	1	0	2	4	0	0	0	0	1	0	1
DENOVO310	Bacteria;Firmicutes;Clostridia;Clostridiales;Lachnospiraceae;Blautia	3	0	0	0	0	17	2	2	1	0	0	0	0	2	28	0	0	0	0	0	0	10	13	0	0	0	0	0	0	4	8	0	0	0	0	1	1	19	2	0	0	0	0	0	1	0	0	0
DENOVO311	Bacteria;Firmicutes;Clostridia;Clostridiales	8	0	0	0	0	0	1	31	3	0	0	0	0	0	0	5	1	0	0	0	0	0	0	5	12	0	0	0	0	0	0	8	2	1	0	5	0	0	0	14	4	0	0	0	0	0	0	24
DENOVO312	Unclassified	6	0	0	0	0	0	0	29	19	0	0	0	0	0	0	48	42	0	0	0	0	0	0	16	64	0	0	12	0	0	0	51	43	0	0	4	0	1	0	61	23	0	0	0	0	0	0	68
DENOVO313	Bacteria;Firmicutes;Clostridia;Clostridiales;Ruminococcaceae	2	0	0	12	0	8	8	0	0	1	1	13	0	0	24	0	2	0	0	0	0	16	88	0	0	0	1	11	0	9	98	0	0	0	0	4	0	8	9	0	1	0	0	0	0	0	0	0
DENOVO314	Bacteria;Firmicutes;Clostridia;Clostridiales;Lachnospiraceae	4	1	0	1	0	16	19	0	0	0	0	0	0	1	16	0	0	0	0	1	0	3	2	2	0	1	0	9	0	6	27	0	1	1	1	7	0	22	10	0	0	0	0	0	0	23	0	0
DENOVO315	Bacteria;Bacteroidetes;Bacteroidia;Bacteroidales;Prevotellaceae;Prevotella;Prevotella_ruminicola	4	4	0	0	2	0	95	26	9	0	0	0	1	0	0	8	32	0	0	0	0	0	0	38	13	0	0	12	1	0	7	12	14	2	0	12	1	0	0	15	5	0	1	0	0	0	0	24
DENOVO316	Bacteria;Bacteroidetes;Bacteroidia;Bacteroidales;Prevotellaceae;Prevotella;Prevotella_ruminicola	0	0	0	0	0	0	0	2	1	0	0	0	0	0	0	3	81	0	0	0	0	1	0	90	6	0	0	0	0	0	0	5	0	0	0	0	0	0	0	1	0	0	0	0	0	0	0	3
DENOVO317	Bacteria;Firmicutes;Clostridia;Clostridiales	0	51	9	0	18	0	0	0	0	29	17	0	11	0	0	0	0	8	12	0	11	0	0	0	0	17	22	0	9	23	0	0	0	13	8	0	36	0	0	0	0	20	5	0	7	0	0	0
DENOVO318	Unclassified	0	45	14	0	15	0	0	0	0	23	30	0	77	0	0	0	0	9	15	0	50	0	0	0	0	12	11	0	23	11	0	0	0	24	30	0	25	0	0	0	0	27	4	0	36	0	0	0
DENOVO319	Bacteria;Firmicutes;Clostridia;Clostridiales;Clostridiales_Family_XIII._Incertae_Sedis	0	0	3	0	0	0	0	0	0	12	4	0	22	0	0	0	0	8	5	0	9	0	0	0	0	6	11	0	6	2	0	0	0	9	3	0	6	0	0	0	0	7	3	0	7	0	0	0
DENOVO320	Bacteria;Firmicutes;Clostridia;Clostridiales;Ruminococcaceae;Ruminococcus;Ruminococcus_bromii	6	2	0	3	1	42	32	4	0	0	0	50	1	3	122	0	0	1	0	0	1	31	48	2	3	0	1	6	7	17	63	1	0	4	1	5	1	120	2	0	0	0	1	0	1	24	40	0
DENOVO321	Bacteria;Firmicutes;Clostridia;Clostridiales;Oscillospiraceae;Oscillibacter;Oscillibacter_ruminantium	0	83	14	0	25	0	0	0	0	18	24	0	23	0	0	0	0	20	14	0	34	0	0	0	0	25	12	0	29	8	0	0	0	30	30	0	18	0	0	0	0	31	26	0	30	0	0	0
DENOVO322	Unclassified	0	11	4	0	4	0	0	0	0	4	5	0	6	0	0	0	0	11	15	0	18	0	0	0	0	6	3	0	10	3	0	0	0	7	3	0	70	0	0	0	0	3	0	0	2	0	0	0
DENOVO323	Bacteria;Spirochaetes;Spirochaetia;Spirochaetales;Spirochaetaceae;Treponema;Treponema_porcinum	1	81	22	0	16	0	0	0	0	17	13	0	33	0	0	0	0	0	0	0	0	0	0	0	0	0	0	0	0	0	0	2	0	5	1	0	4	0	0	0	3	12	3	0	6	0	0	2
DENOVO324	Bacteria;Actinobacteria;Coriobacteriia;Coriobacteriales;Atopobiaceae;Olsenella	1	0	0	0	1	4	0	0	0	0	0	4	0	0	63	2	1	0	0	0	0	50	11	0	0	0	0	0	0	7	35	0	0	0	0	0	2	26	0	0	0	0	0	0	0	14	14	0
DENOVO325	Bacteria;Firmicutes;Clostridia;Clostridiales;Ruminococcaceae;Ruminococcus;Ruminococcus_bromii	3	0	0	3	0	9	6	0	0	0	0	39	0	1	51	0	1	0	0	0	0	69	64	1	1	0	0	5	0	9	52	0	0	1	0	2	1	17	0	0	0	0	0	0	1	5	0	0
DENOVO326	Bacteria;Firmicutes;Clostridia;Clostridiales;Lachnospiraceae	2	0	0	1	0	0	12	17	4	0	0	0	0	0	0	1	1	0	0	0	0	0	0	1	6	0	0	10	0	0	0	12	8	0	0	0	0	0	0	7	1	0	0	0	0	0	0	6
DENOVO327	Unclassified	0	40	12	0	10	0	1	8	1	23	8	0	26	0	0	6	0	45	46	0	87	0	0	0	2	8	5	0	7	6	0	2	3	21	10	4	57	0	0	1	2	18	10	0	9	0	0	8
DENOVO328	Bacteria;Firmicutes;Clostridia;Clostridiales;Eubacteriaceae;Eubacterium;Eubacterium_coprostanoligenes	0	65	45	0	45	0	0	0	0	49	55	0	128	0	0	0	0	21	40	0	49	0	0	0	1	90	41	0	130	311	0	0	0	6	2	0	43	0	0	0	0	14	8	0	5	0	0	0
[truncated: 112 more columns]
