# Supplementary material for: Bacterial communities in the gastrointestinal tract segments of helminth-resistant and helminth-susceptible sheep
Source: Anim Microbiome. 2022 Mar 14;4:23. doi: 10.1186/s42523-022-00172-1 (PMC8922854; doi:10.1186/s42523-022-00172-1)
Supplement: Supplementary file 6 — Additional file 6: Table S6. Pairwise differences in beta diversity among GIT segments of High- and Low-FEC sheep. [file 42523_2022_172_MOESM6_ESM.xlsx]

## Sheet: Pairwise.permanova
	ID	stat	p
1	Abomasum_VS_Caecum	permanova:R 0.428	p: 0.001
2	Abomasum_VS_Colon	permanova:R 0.427	p: 0.001
3	Abomasum_VS_Duodenum	permanova:R 0.308	p: 0.001
4	Abomasum_VS_Faeces	permanova:R 0.378	p: 0.001
5	Abomasum_VS_Ileum	permanova:R 0.419	p: 0.001
6	Abomasum_VS_Jejunum	permanova:R 0.346	p: 0.001
7	Abomasum_VS_Rumen	permanova:R 0.226	p: 0.001
8	Caecum_VS_Colon	permanova:R 0.03	p: 0.31
9	Caecum_VS_Duodenum	permanova:R 0.502	p: 0.001
10	Caecum_VS_Faeces	permanova:R 0.109	p: 0.005
11	Caecum_VS_Ileum	permanova:R 0.549	p: 0.001
12	Caecum_VS_Jejunum	permanova:R 0.518	p: 0.001
13	Caecum_VS_Rumen	permanova:R 0.51	p: 0.001
14	Colon_VS_Duodenum	permanova:R 0.495	p: 0.001
15	Colon_VS_Faeces	permanova:R 0.054	p: 0.097
16	Colon_VS_Ileum	permanova:R 0.546	p: 0.001
17	Colon_VS_Jejunum	permanova:R 0.511	p: 0.001
18	Colon_VS_Rumen	permanova:R 0.549	p: 0.001
19	Duodenum_VS_Faeces	permanova:R 0.46	p: 0.001
20	Duodenum_VS_Ileum	permanova:R 0.276	p: 0.001
21	Duodenum_VS_Jejunum	permanova:R 0.109	p: 0.002
22	Duodenum_VS_Rumen	permanova:R 0.462	p: 0.001
23	Faeces_VS_Ileum	permanova:R 0.508	p: 0.001
24	Faeces_VS_Jejunum	permanova:R 0.468	p: 0.001
25	Faeces_VS_Rumen	permanova:R 0.542	p: 0.001
26	Ileum_VS_Jejunum	permanova:R 0.149	p: 0.001
27	Ileum_VS_Rumen	permanova:R 0.556	p: 0.001
28	Jejunum_VS_Rumen	permanova:R 0.5	p: 0.001
